1 **Genetic determinants of gut microbiota composition and bile acid profiles in**  
2 **mice**

3  
4  
5 Julia H. Kemis<sup>1</sup>, Vanessa Linke<sup>2</sup>, Kelsey L. Barrett<sup>1</sup>, Frederick J. Boehm<sup>4</sup>, Lindsay L. Traeger<sup>1</sup>,  
6 Mark P. Keller<sup>3</sup>, Mary E. Rabaglia<sup>3</sup>, Kathryn L. Schueler<sup>3</sup>, Donald S. Stapleton<sup>3</sup>, Daniel M. Gatti<sup>8</sup>,  
7 Gary A. Churchill<sup>8</sup>, Daniel Amador-Noguez<sup>1</sup>, Jason D. Russell<sup>2</sup>, Brian S. Yandell<sup>4</sup>, Karl W.  
8 Broman<sup>5</sup>, Joshua J. Coon<sup>2,6,7</sup>, Alan D. Attie<sup>3</sup> and Federico E. Rey\*<sup>1</sup>

9  
10 <sup>1</sup> Department of Bacteriology, University of Wisconsin – Madison, Madison, WI, USA

11 <sup>2</sup> Department of Chemistry, University of Wisconsin – Madison, Madison, WI, USA

12 <sup>3</sup> Department of Biochemistry, University of Wisconsin – Madison, Madison, WI, USA

13 <sup>4</sup> Department of Statistics, University of Wisconsin – Madison, Madison, WI, USA

14 <sup>5</sup> Department of Biostatistics and Medical Informatics, University of Wisconsin – Madison,  
15 Madison, WI, USA

16 <sup>6</sup> Morgridge Institute for Research, Madison, WI 53715

17 <sup>7</sup> Department of Biomolecular Chemistry, University of Wisconsin – Madison, Madison, WI, USA

18 <sup>8</sup> Jackson Laboratory, Bar Harbor, ME, USA

19

20 **Key words:** Gut microbiome, genetics, bile acids

21

22 **\*Corresponding author:**

23 Federico E. Rey

24 Email: [ferey@wisc.edu](mailto:ferey@wisc.edu)

## 25 **Abstract**

26 The microbial communities that inhabit the distal gut of humans and other mammals exhibit large  
27 inter-individual variation. While host genetics is a known factor that influences gut microbiota  
28 composition, the mechanisms underlying this variation remain largely unknown. Bile acids (BAs)  
29 are hormones that are produced by the host and chemically modified by gut bacteria. BAs serve as  
30 environmental cues and nutrients to microbes, but they can also have antibacterial effects. We  
31 hypothesized that host genetic variation in BA metabolism and homeostasis influence gut  
32 microbiota composition. To address this, we used the Diversity Outbred (DO) stock, a population  
33 of genetically distinct mice derived from eight founder strains. We characterized the fecal  
34 microbiota composition and plasma and cecal BA profiles from 400 DO mice maintained on a  
35 high-fat high-sucrose diet for ~22 weeks. Using quantitative trait locus (QTL) analysis, we  
36 identified several genomic regions associated with variations in both bacterial and BA profiles.  
37 Notably, we found overlapping QTL for *Turicibacter sp.* and plasma cholic acid, which mapped  
38 to a locus containing the gene for the ileal bile acid transporter, *Slc10a2*. Mediation analysis and  
39 subsequent follow-up validation experiments suggest that differences in *Slc10a2* gene expression  
40 associated with the different strains influences levels of both traits and revealed novel interactions  
41 between *Turicibacter* and BAs. This work illustrates how systems genetics can be utilized to  
42 generate testable hypotheses and provide insight into host-microbe interactions.

43

## 44 **Author summary**

45 Inter-individual variation in the composition of the intestinal microbiota can in part be attributed  
46 to host genetics. However, the specific genes and genetic variants underlying differences in the  
47 microbiota remain largely unknown. To address this, we profiled the fecal microbiota composition

48 of 400 genetically distinct mice, for which genotypic data is available. We identified many loci of  
49 the mouse genome associated with changes in abundance of bacterial taxa. One of these loci is  
50 also associated with changes in the abundance of plasma bile acids—metabolites generated by the  
51 host that influence both microbiota composition and host physiology. Follow up validation  
52 experiments provide mechanistic insights linking host genetic differences, with changes in ileum  
53 gene expression, bile acid-bacteria interactions and bile acid homeostasis. Together, this work  
54 demonstrates how genetic approaches can be used to generate testable hypothesis to yield novel  
55 insight into how host genetics shape gut microbiota composition.

56

## 57 **Introduction**

58 The intestinal microbiota has profound effects on host physiology and health (1–3). The  
59 composition of the gut microbiota is governed by a combination of environmental factors,  
60 including diet, drugs, maternal seeding, cohabitation, and host genetics (4–7). Together, these  
61 factors cause substantial inter-individual variation in microbiota composition and modulate disease  
62 risk (8,9). Alterations in the composition of the microbiota are associated with a spectrum of  
63 cognitive, inflammatory and metabolic disorders (10–12) and a number of bacterial taxa have been  
64 causally linked with modulation of disease (13–15). A major challenge in the field is deciphering  
65 how host genetics and environmental factors interact to shape the composition of the gut  
66 microbiota. This knowledge is key for designing strategies aimed at modifying gut microbiota  
67 composition to improve health outcomes.

68 Several mouse and human studies have examined the role of host genetics in shaping the  
69 composition of the gut microbiota (16). Mouse studies comparing gut bacterial communities from  
70 inbred mouse strains (17,18) and strains harboring mutations in immune-related genes (19–22)

71 support this notion. Additionally, quantitative trait locus (QTL) analyses in mice have identified  
72 genetic regions associated with the abundance of several bacterial taxa and community structure  
73 (23–26). Twin studies and genome-wide association studies (GWAS) in humans have identified  
74 heritable bacterial taxa and SNPs associated with specific gut microbes. While comparing these  
75 studies is often difficult due to differences in environmental variables among populations, some  
76 associations are consistently detected among geographically discrete populations, such as the  
77 association between *Bifidobacterium* abundance and the lactase (*LCT*) gene locus (27–29),  
78 indicating the abundance of specific taxa is influenced by host genetic variation.

79 Gut microbes and the host communicate through the production and modification of metabolites,  
80 many of which impact host physiology (30–34). Bile Acids (BAs) are host-derived and microbial-  
81 modified metabolites that regulate both the gut microbiome and host metabolism (35–37). BAs are  
82 synthesized in the liver from cholesterol, stored in the gallbladder and are secreted in the proximal  
83 small intestine where they facilitate absorption of fat-soluble vitamins and lipids. Once in the  
84 intestine, BAs can be metabolized by gut bacteria through different reactions, including  
85 deconjugation, dehydroxylation, epimerization, and dehydrogenation, to produce secondary BAs  
86 with differential effects on the host (33,35). In addition to their direct effects on the host, BAs  
87 shape the gut microbiota composition through antimicrobial activities (38,39). The detergent  
88 properties of BAs cause plasma membrane damage. The bactericidal activity of a BA molecule  
89 corresponds to its hydrophobicity (40). Additionally, the microbiota modulates primary BA  
90 synthesis through regulation of the nuclear factor FXR (41). Thus, we hypothesized that host  
91 genetic variation associated with changes in BA homeostasis mediates alterations in gut microbiota  
92 composition.

93 To investigate how genetic variation affects gut microbiota and BA profiles, we used the  
94 Diversity Outbred (DO) mouse population, which is a heterogenous population derived from eight  
95 founder strains: C57BL6/J (B6), A/J (A/J), 1291/SvImJ (129), NOD/ShiLtJ (NOD), NZO/HiLtJ  
96 (NZO), CAST/EiJ (CAST), PWK/PhJ (PWK), and WSB/EiJ (WSB) (42,43). These eight strains  
97 capture a large breadth of the genetic diversity found in inbred mouse strains. Additionally, the  
98 founder strains harbor distinct gut microbial communities and exhibit disparate metabolic  
99 responses to diet-induced metabolic disease (18,44,45). The DO population is maintained by an  
100 outbreeding strategy aimed at maximizing the heterozygosity of the outbred stock. The genetic  
101 diversity and large number of generations of outbreeding make it an ideal resource for high-  
102 resolution genetic mapping of microbial and metabolic traits (43).

103 We characterized the intestinal microbiota composition and plasma and cecal BA profiles in ~400  
104 genetically distinct DO mice fed a high-fat/high-sucrose diet for ~22 weeks and performed  
105 quantitative trait loci (QTL) analysis to identify host genetic loci associated with these traits.  
106 Specifically, we focused our analysis on potentially pleiotropic loci, which we defined as a single  
107 genetic locus that associates with both bacterial and BA traits. Our analysis revealed several  
108 instances of bacterial and metabolite traits attributed to the same DO founder haplotypes mapping  
109 to the same position of the mouse genome, including a locus associated with plasma BA levels and  
110 the disease-modulating organism *Akkermansia muciniphila*. Additionally, we identified the ileal  
111 BA transporter *Slc10a2* as a candidate gene that regulates both the abundance of *Turicibacter sp.*  
112 and plasma levels of cholic acid.

113

114

## 115 **Results and discussion**

### 116 **Phenotypic variation among Diversity Outbred (DO) mice fed high-fat and high-sucrose diet**

117 We investigated the impact of genetic variation on gut microbiota composition and bile  
118 acid (BA) profiles using a cohort of ~400 DO mice maintained on a high-fat high-sucrose diet  
119 (45% kcal from fat and 34% from sucrose) for ~22 weeks (range 21-25 weeks), starting at weaning.  
120 Additionally, we incorporated in our analyses previously published clinical weight traits collected  
121 from the same mice (46) (Fig 1A). All animals were individually housed throughout the duration  
122 of the study to minimize microbial exchange.

123 We performed LC-MS analyses of plasma and cecal contents to assess abundance of 27  
124 BAs. There was substantial variation in the plasma and cecal BA profiles across the 400 mice (Fig  
125 1C and 1D; S1 Table). Additionally, we examined gut microbiota composition using 16S rRNA  
126 gene amplicon sequencing of DNA extracted from fecal samples collected at the end of the  
127 experiment. Within the cohort, there were 907 unique Exact Sequence Variants (ESVs), (100%  
128 operational taxonomic units defined with dada2 (47)), which were agglomerated into 151 lower  
129 taxonomic rankings (genus, family, order, class, phyla) (S1 Table). The microbial traits  
130 represented each of the major phyla found in the intestine and the relative abundance of these phyla  
131 was highly variable among the DO mice (Fig 1B). For instance, the abundance of taxa classified  
132 to the Bacteroidetes phylum ranged from 1.17 – 89.28%.

133 For subsequent analysis, we identified a core measurable microbiota (CMM), which we defined  
134 as taxon found in at least 20% of the mice (24). This was done to remove the effects of excessive  
135 variation in the data due to bacterial taxa that were low abundance and/or sparsely distributed. In  
136 total, the CMM was comprised of 86 ESVs and 42 agglomerated taxa (S2 Table). The CMM traits

137 represent a small fraction of the total microbes detected, but account for 94.5% of the rarefied  
138 sequence reads, and therefore constitute a significant portion of the identifiable microbiota.

139         Since mice were received in waves of 100, we examined whether animals in each wave  
140 were more similar to each other than mice in other waves. The fecal microbiota composition  
141 significantly clustered by wave ( $p < 0.001$ , PERMANOVA) and sex ( $p < 0.001$ , PERMANOVA)  
142 (S1 Fig). PCA analysis of plasma and cecal bile acids showed a significant effect of sex, but not  
143 wave, on both plasma ( $p < 0.0001$ , Kruskal Wallis) and cecal BA profiles ( $p < 0.05$ , Kruskal  
144 Wallis) (S2 Fig).

145         There is substantial evidence implicating gut microbiota and BAs in metabolic disease  
146 development (36,37). To identify potential relationships among these traits, we performed  
147 correlation analysis which yielded many significant associations after FDR correction ( $FDR <$   
148  $0.05$ ) (S3 Table, discussed in S1 Data).

149

### 150 **Abundance of gut bacterial taxa and bile acids are associated with host genetics**

151         To identify associations between regions of the mouse genome and the clinical and  
152 molecular traits discussed above, we performed QTL analysis using the R/qtl2 package (48). We  
153 used sex, days on the diet, and experimental cohort (wave) as covariates. We identified 459 QTL  
154 for bacterial (306), bile acid (131), and body weight (22) traits (Fig 2, S4 Table) with a LOD score  
155  $> 5.5$ .

156         Of the microbial QTL, we found 190 QTL for 76 distinct bacterial ESVs from four phyla  
157 that met a cut-off  $LOD > 5.5$ . ESVs with the strongest QTL ( $LOD > 8$ ) are classified to the  
158 Clostridiales order and map on chr 12 at ~33 Mbp, the Lachnospiraceae family on chr 2 at 164  
159 Mbp, and the S24-7 family on chr 2 at ~115 Mbp. We also identified 116 QTL for microbial taxa

160 collapsed by taxonomic assignment (i.e., genus to phylum). The genera *Lactococcus* and  
161 *Akkermansia* were also associated with host genetic variation, which is consistent with previous  
162 studies (23,24,49,50).

163 Similarly, BA QTL mapped to multiple loci spanning the mouse genome and most BA  
164 traits mapped to multiple positions. BA synthesis and metabolism are regulated by multiple host  
165 signaling pathways: there are >17 known host enzymes involved in the production of BAs (36),  
166 transporters, which play a critical role in maintaining the enterohepatic circulation and BA  
167 homeostasis, and receptors that respond to BA in a variety of host tissues (51–53). Therefore, it is  
168 not surprising that our results indicate that BA levels are polygenic and shaped by multiple host  
169 factors.

170 We observed multiple instances of related BA species associating to the same genetic  
171 locus. These overlapping QTL may indicate the presence of a pleiotropic locus. Interestingly,  
172 several of these loci associate with levels of related BA species in different stages of microbial  
173 modification. For example, cecal taurocholic acid (TCA) and plasma CA QTL overlap on chr 7 at  
174 122 Mbp. Likewise, four BA QTL that are all derivatives of the secondary BA DCA, including  
175 plasma TDCA and cecal DCA, isodeoxycholic acid (IDCA), and HDCA overlap on chr 12  
176 between ~99 – 104 Mbp. For the cecal BA, the WSB founder haplotype was associated with higher  
177 levels of these three BA, while the NOD founder haplotype was associated with lower levels. The  
178 opposite pattern was observed for plasma TDCA, where the NOD and WSB haplotype were  
179 associated with higher and lower levels, respectively (S3A-S3D Fig).

180 We also identified overlapping QTLs on chr 11 at ~71 Mbp for cecal levels of the  
181 secondary BAs lithocholic acid (LCA) and isolithocholic acid (ILCA), the isomer of LCA  
182 produced by bacterial 3 $\alpha$ -hydroxylation (S3E Fig). Higher levels of these cecal BAs are associated



183 with the 129 founder haplotype and lower levels are associated with the A/J founder haplotype  
184 (S3F-S3G Fig). We identified the positional candidate gene *Slc13a5* (S3H Fig), which is a sodium-  
185 dependent transporter that mediates cellular uptake of citrate, an important precursor in the  
186 biosynthesis of fatty acids and cholesterol (54). Recent evidence indicates that *Slc13a5* influences  
187 host metabolism and energy homeostasis (55–57). *Slc13a5* is a transcriptional target of pregnane  
188 X receptor (PXR) (58), which also regulates the expression of genes involved in the biosynthesis,  
189 transport, and metabolism of BAs (59).

190

## 191 **Co-mapping analyses identifies novel interactions between bacterial taxa and bile acid** 192 **homeostasis**

193 We searched for regions of the chromosome that were associated with both BA and  
194 bacterial abundance, as this may provide evidence of interactions between the traits (60). We  
195 identified 17 instances of overlapping microbial and BA QTL on 12 chromosomes. This QTL  
196 overlap indicates there might be QTL with pleiotropic effects on BAs and the microbiota, suggest  
197 that genetic variation influencing host BA profiles has an effect on compositional features of the  
198 gut microbiota, or genetic-driven variation in microbiota composition alters BAs. Examples of  
199 notable instances of overlapping bacterial and BA QTL are discussed in the Supporting  
200 Information (S1 Data).

201 We focused our co-mapping analysis on chr 8 at ~ 5.5 Mbp, where *Turicibacter sp.* QTL  
202 and plasma cholic acid (CA) QTL overlap (Fig 3A and 3B). These traits were particularly  
203 interesting because both have been shown to be influenced by host genetics by previous studies.  
204 *Turicibacter* has been identified as highly heritable in both mouse and human genetic studies  
205 (24,27,45,49), whereas multiple reports have found differences in CA levels as a function of host

206 genotype (18,61). Furthermore, CA levels are influenced by both host genetics and microbial  
207 metabolism since it is synthesized by host liver enzymes from cholesterol and subsequently  
208 modified by gut microbes in the intestine. Notably, these co-mapping traits also share the same  
209 allele effects pattern, where the A/J and WSB haplotypes have strong positive and negative  
210 associations, respectively (Fig 3C and 3D).

211 To assess whether the trait patterns observed in the DO founder strains correspond to the  
212 observed allelic effects in the QTL mapping, we performed a separate characterization of the fecal  
213 microbiota composition and plasma bile acids in age-matched A/J and WSB animals fed the  
214 HF/HS diet. The founder strain allele patterns inferred from the QTL mapping closely resembled  
215 the observed levels of *Turicibacter sp.* (Fig 3E) and plasma CA in the founder strains (Fig 3F),  
216 where A/J animals had significantly higher levels of *Turicibacter sp.* and CA than WSB animals.  
217 However, *Turicibacter* levels in the founder strains do not completely mirror the estimated allele  
218 effects. This may be due to other genetic factors that also influence *Turicibacter* levels, as this taxa  
219 may be influenced by multiple host genes and levels of *Turicibacter* have previously been  
220 associated on chr 7 (24), 9 and 11 (49). Furthermore, *Turicibacter* and plasma CA were positively  
221 correlated in the DO mice ( $r = 0.43$ ,  $p = 3.53e^{-10}$ ). This finding is consistent with a previous study  
222 that found positive correlations between *Turicibacter* and unconjugated cecal BAs (62). Taken  
223 together, the overlap between the *Turicibacter sp.* QTL and plasma CA QTL, along with the  
224 similar allele effects pattern, which reflect the values observed in the founder strains, provide  
225 strong evidence suggesting that these traits are related and they are responding to the common  
226 genetic driver.

227

228 ***Slc10a2* is a candidate gene for *Turicibacter sp.* and plasma cholic acid**

229 We searched in the QTL confidence interval for candidate genes via high-resolution  
230 association mapping on chr 8 and identified SNPs associated with both traits. Among these we  
231 identified SNPs upstream of the gene *Slc10a2*, which encodes for the apical sodium-bile  
232 transporter (Fig 3G). *Slc10a2* is responsible for ~95% of BA reabsorption in the distal ileum and  
233 plays a key role in BA homeostasis (63). In humans, mutations in this gene are responsible for  
234 primary BA malabsorption, resulting in interruption of enterohepatic circulation of BAs and  
235 decreased plasma cholesterol levels (64). Likewise, *Slc10a2*<sup>-/-</sup> mice have a reduced total BA pool  
236 size, increased fecal BA concentrations and reduced total plasma cholesterol in comparison to  
237 wild-type mice (63). Additionally, a comparison between germ-free and conventionally-raised  
238 mice found that expression of *Slc10a2* is downregulated in presence of the gut microbiota,  
239 suggesting microbes may influence the expression of the transporter (41).

240 Our analysis identified SNPs associated with levels of *Turicibacter sp.* and plasma CA at  
241 the QTL peak (Fig 3G). The SNPs with the strongest associations were attributed to the WSB and  
242 A/J haplotypes and fell on intergenic regions near *Slc10a2*. There is growing evidence that non-  
243 coding intergenic SNPs are often located in or closely linked to regulatory regions, suggesting that  
244 they may influence host regulatory elements and alter gene expression (65,66). To assess if  
245 candidate gene expression patterns in the DO founders corresponds to the estimated allelic effects  
246 in the QTL mapping, we quantified *Slc10a2* expression in distal ileum samples from A/J and WSB  
247 mice by quantitative reverse transcriptase PCR (qRT-PCR). A/J mice exhibited significantly  
248 higher expression of *Slc10a2* compared to WSB mice (Fig 3H), which is consistent with estimated  
249 allele patterns for the overlapping *Turicibacter* and plasma CA QTLs on chr 8 (Fig 3A and 3B).  
250 Remarkably, several studies have noted concomitant changes in microbiota composition and  
251 *Slc10a2* mRNA levels (67–69).

252

253 **A common genetic driver controls *Turicibacter sp.* and plasma cholic acid**

254 We mapped QTL for *Turicibacter sp.* and for plasma CA levels to a common locus on chr  
255 8 at 5-7 Mbp. Since the LOD profiles and allelic effects are highly similar, the QTL may be due  
256 to a single shared locus (pleiotropy) or multiple closely linked loci. We examined this question  
257 using a likelihood ratio testing of the null hypothesis of pleiotropy versus the alternative of two  
258 independent genetic regulators of these traits (70). Analysis of 1000 bootstrap samples resulted in  
259 a p-value of 0.531, which is consistent with the presence of a single pleiotropic locus that affects  
260 both traits.

261 We next sought to understand the causal relationships between the microbe and the BA.  
262 We asked whether the relationship between the microbe and BA was causal, reactive or  
263 independent. To establish the directionality of the relationship, we applied mediation analysis  
264 where we conditioned one trait on the other (71). When we conditioned *Turicibacter sp.* on plasma  
265 CA (QTL → BA → Microbe), we observed a LOD drop of 3.2 (Fig 4A and 4B). Likewise, when  
266 we conditioned the plasma cholic acid on the microbe (QTL → Microbe → BA) there was a LOD  
267 drop of 3.32 (Fig 4C and 4D). The partial mediation seen in both models suggests that the  
268 relationship between the microbe and the BA could be bidirectional, where they exert an effect on  
269 one another.

270 From this analysis, we can hypothesize this relationship can be explained by a pleiotropic  
271 model, where a single locus influences a microbial and a BA trait, and the microbial trait is also  
272 reactive to changes in the BA trait. It is important to note that statistical inference only partially  
273 explains the relationship between the traits and there may be other hidden variables that may  
274 further explain the relationship. The complex relationship depicted by the causal inference testing

275 is consistent with the interplay between gut microbes and BAs in the intestine and their known  
276 ability to influence the other.

277

### 278 **Bile acids inhibit *Turicibacter sanguinis* growth at physiologically relevant concentrations**

279 Due to the strong correlative relationship between the QTL, we tested whether there was a  
280 direct interaction between bile acids and *Turicibacter*. *Turicibacter* inhabits the small intestine  
281 where BAs are secreted upon consumption of a meal (73,74). We screened the human isolate  
282 *Turicibacter sanguinis* for deconjugation and transformation activity *in vitro* by HPLC/MS-MS.  
283 We found that *T. sanguinis* deconjugated ~96-100% of taurocholic acid and  
284 glycochenodeoxycholic acid (Fig 5A) within 24 hours. It also transformed ~6 and 8 % of CA and  
285 CDCA to 7-dHCA and 7-ketolithocholic acid (7-KLCA), respectively (Fig 5B and 5C). The  
286 percent transformed did not increase after 24 hours (data not shown). Both of these transformations  
287 require the action of the bacterial 7 $\alpha$ -hydroxysteroid dehydrogenase.

288 Based on these results, we asked if conjugated and unconjugated bile acids differentially  
289 modulate *T. sanguinis* growth. BA concentrations range from ~1-10 mM along the small intestine  
290 (75) to ~0.2-1 mM in the cecum (76). Therefore, we grew *T. sanguinis* in the presence of either  
291 conjugated or unconjugated bile acids at physiologically relevant concentrations ranging from 0.1  
292 – 5 mM. *T. sanguinis* growth decreased with increasing concentrations of BAs and growth was  
293 completely inhibited at 1 mM for unconjugated BAs and 5 mM for conjugated BAs (Fig 5D and  
294 5E). Growth rate was significantly slower in the presence of 1 mM conjugated and 0.5mM  
295 unconjugated bile acids (Fig 5F). These results suggest that levels of BAs may affect abundance  
296 of *Turicibacter* in the gut.

297 To compare *T. sanguinis* sensitivity to conjugated bile acids relative to other small intestine  
298 colonizers, we grew four taxa (*Bacteroides thetaiotaomicron*, *Clostridium asparagiforme*,  
299 *Lactobacillus reuteri* and *Escherichia coli* MS200-1) known to colonize this region of the intestine  
300 with or without 1 mM conjugated bile acids. Members of these genera are known to have bile salt  
301 hydrolase (BSH) activity to deconjugate bile acids (35). Unlike *T. sanguinis*, the addition of high  
302 levels of conjugated bile acids had little to no effect on the growth of these four gut microbes (S4  
303 Fig). Consistent with these findings, *Turicibacter* abundance was negatively correlated with cecal  
304 TCA levels in the DO mice ( $r = -0.262$ ,  $p = 0.0035$ ).

305 Taken together, these data indicate that *T. sanguinis* is sensitive to higher concentrations  
306 of BA compared to other small intestine colonizers. These reciprocal effects between the BA and  
307 the bacterium provide biological evidence for the correlative relationship shown by the causal  
308 model testing. In summary, using a genetic approach, we identified and provide validation of a  
309 relationship between a genetic locus containing the BA transporter *Slc10a2*, and levels of  
310 *Turicibacter* and plasma cholic acid. Based on our findings, we hypothesize that the identified  
311 locus regulates expression of *Slc10a2*, altering active BA reabsorption in the ileum, leading to  
312 increased intestinal BA concentrations and alterations in the intestinal BA environment.  
313 Consequently, the resulting environmental change provides an unfavorable habitat for  
314 *Turicibacter*. In turn, lower levels of *Turicibacter* BA deconjugation activity leads to a decrease  
315 in circulating free plasma cholic acid levels.

316

## 317 **Conclusion**

318 In this study, we performed the first known genetic mapping integration of gut microbiome  
319 and BA profiles. Using DO mice, we identified multiple QTL for gut microbes and bile acids

320 spanning the host genome. These included loci that associated with individual microbial and BA  
321 traits, as well as loci with potential pleiotropic effects, where a single genetic region influenced  
322 both the abundance of a gut microbe and levels of a BA. While several studies suggest that host  
323 genetic variation has a minor impact on microbiota composition, there are overlapping findings  
324 among different studies in both human and mouse populations that indicate that specific bacterial  
325 taxa are influenced by host genetics. Our results in the DO population corroborate several of these  
326 key findings (discussed in S1 Data). *Turicibacter sp.* is among the microbes consistently  
327 associated with host genetics. This work plus data from previous reports suggest that alterations in  
328 the BA pool driven by *Slc10a2* genetic variation and concomitant changes in expression/activity  
329 elicit an impact on gut microbiota community structure and influence the ability of *Turicibacter*  
330 to colonize and persist in the intestine. Although this microbe deconjugates primary BAs, we found  
331 that it is also sensitive to elevated concentrations of both conjugated and unconjugated BAs. Future  
332 experiments are needed to examine how a decrease in *Slc10a2* expression changes intestinal BA  
333 profiles and the consequences on *Turicibacter* colonization. Additionally, this work identified  
334 multiple host-microbe-metabolite interactions that need to be validated with additional molecular  
335 studies. More broadly, our work demonstrates the power of genetics to identify novel interactions  
336 between microbial and metabolite traits and provides new testable hypotheses to further dissect  
337 factors that shape gut microbiota composition.

338

339

## 340 **Materials and methods**

341 **Animals and sample collection.** Animal care and study protocols were approved by the  
342 University of Wisconsin-Madison Animal Care and Use Committee. DO mice were obtained from  
343 the Jackson Laboratories (Bar Harbor, ME, USA) at ~4 weeks of age and maintained in the

344 Department of Biochemistry vivarium at the University of Wisconsin-Madison. Mice were housed  
345 on a 12-hour light:dark cycle under temperature- and humidity-controlled conditions. Five waves  
346 of 100 DO mice each from generations, 17, 18, 19, 21, and 23 were obtained at intervals of 3-6  
347 months. Each wave was composed of equal numbers of male and female mice. All mice were fed  
348 a high-fat high-sucrose diet (TD.08811, Envigo Teklad, 44.6% kcal fat, 34% carbohydrate, and  
349 17.3% protein) *ad libitum* upon arrival to the facility. Mice were kept in the same vivarium room  
350 and were individually housed to monitor food intake and prevent coprophagy between animals.  
351 DO mice were sacrificed at 22-25 weeks of age.

352 The eight DO founder strains (C57BL/6J, A/J, 129S1/SvImJ, NOD/ShiLtJ, NZO/HILtJ,  
353 PWK/PhJ, WSB/EiJ and CAST/EiJ) were obtained from the Jackson Laboratories. Mice were bred  
354 at the University of Wisconsin-Madison Biochemistry Department. Mice were housed by strain  
355 and sex (2-5 mice/cage), with the exception of CAST that required individual housing. Inbred  
356 founder mice were housed under the same environmental conditions as the DO animals. Like the  
357 DO mice, the eight founder strains were maintained on the HF/HS diet and were sacrificed at 22  
358 weeks of age, except for NZO males that were sacrificed at 14 weeks, due to high mortality  
359 attributable to severe disease.

360 For both DO and founder mice, fecal samples for 16S rRNA sequencing were collected  
361 immediately before sacrifice after a 4 hour fast. Cecal contents, plasma, and additional tissues were  
362 harvested promptly after sacrifice and all samples were immediately flash frozen in liquid nitrogen  
363 and stored at -80°C until further processing.

364

365 **DNA extraction.** DNA was isolated from feces using a bead-beating protocol  
366 {Turnbaugh:2009ei}. Mouse feces (~1 pellet per animal) were re-suspended in a solution



367 containing 500µl of extraction buffer [200mM Tris (pH 8.0), 200mM NaCl, 20mM EDTA], 210µl  
368 of 20% SDS, 500µl phenol:chloroform:isoamyl alcohol (pH 7.9, 25:24:1) and 500µl of 0.1-mm  
369 diameter zirconia/silica beads. Cells were mechanically disrupted using a bead beater (BioSpec  
370 Products, Barlesville, OK; maximum setting for 3 min at room temperature), followed by  
371 extraction with phenol:chloroform:isoamyl alcohol and precipitation with isopropanol.  
372 Contaminants were removed using QIAquick 96-well PCR Purification Kit (Qiagen, Germantown,  
373 MD, USA). Isolated DNA was eluted in 5 mM Tris/HCL (pH 8.5) and was stored at -80°C until  
374 further use.

375

376 **16S rRNA Sequencing.** PCR was performed using universal primers flanking the variable 4 (V4)  
377 region of the bacterial 16S rRNA gene (102). Genomic DNA samples were amplified in duplicate.  
378 Each reaction contained 10-30 ng genomic DNA, 10 µM each primer, 12.5 µl 2x HiFi HotStart  
379 ReadyMix (KAPA Biosystems, Wilmington, MA, USA), and water to a final reaction volume of  
380 25 µl. PCR was carried out under the following conditions: initial denaturation for 3 min at 95°C,  
381 followed by 25 cycles of denaturation for 30 s at 95°C, annealing for 30 s at 55°C and elongation  
382 for 30 s at 72°C, and a final elongation step for 5 min at 72°C. PCR products were purified with  
383 the QIAquick 96-well PCR Purification Kit (Qiagen, Germantown, MD, USA) and quantified  
384 using Qubit dsDNA HS Assay kit (Invitrogen, Oregon, USA). Samples were equimolar pooled  
385 and sequenced by the University of Wisconsin – Madison Biotechnology Center with the MiSeq  
386 2x250 v2 kit (Illumina, San Diego, CA, USA) using custom sequencing primers.

387

388 **16S analysis.** Demultiplexed paired end fastq files generated by CASAVA (Illumina) and a  
389 mapping file were used as input files. Sequences were processed, quality filtered and analyzed

390 with QIIME2 (version 2018.4) (<https://qiime2.org>), a plugin-based microbiome analysis platform  
391 (103). DADA2 (47) was used to denoise sequencing reads with the q2-dada2 plugin for quality  
392 filtering and identification of *de novo* exact sequence variants (ESVs) (i.e. 100% exact sequence  
393 match). This resulted in 20,831,573 total sequences with an average of 52,078 sequences per  
394 sample for the DO mice, and 2,128,796 total sequences with an average of 34,335.4 sequences per  
395 sample for the eight DO founder strains. Sequence variants were aligned with mafft (104) with the  
396 q2-alignment plugin. The q2-phylogeny plugin was used for phylogenetic reconstruction via  
397 FastTree (105). Taxonomic classification was assigned using classify-sklearn (106) against the  
398 Greengenes 13\_8 99% reference sequences (107). Alpha- and beta-diversity (weighted and  
399 unweighted UniFrac (108) analyses were performed using q2-diversity plugin at a rarefaction  
400 depth of 10000 sequences per sample. For the DO mice, one sample (DO071) was removed from  
401 subsequent analysis because it did not reach this sequencing depth. For analysis of the eight DO  
402 founder strains, one sample (NOD5) was removed because it did not reach this sequencing depth.  
403 Subsequent processing and analysis were performed in R (v.3.5.1), and data generated in QIIME2  
404 was imported into R using Phyloseq (109). Sequencing data was normalized by cumulative sum  
405 scaling (CSS) using MetagenomeSeq (110). Summaries of the taxonomic distributions were  
406 generated by collapsing normalized ESV counts into higher taxonomic levels (genus to phylum)  
407 by phylogeny. We defined a core measurable microbiota (CMM) (24) to include only microbial  
408 traits present in 20% of individuals in the QTL mapping. In total, 86 ESVs and 42 collapsed  
409 microbial taxonomies comprised the CMM.

410

411 **Sample preparation for plasma bile acid analysis.** 40  $\mu$ L of DO plasma collected at sacrifice  
412 (30  $\mu$ L used for founder strains) were aliquoted into a tube with 10  $\mu$ L SPLASH Lipidomix internal

413 standard mixture (Avanti Polar Lipids, Inc.). Protein was precipitated by addition of 215  $\mu\text{L}$   
414 MeOH. After the mixture was vortexed for 10 s, 750  $\mu\text{L}$  methyl tert-butyl ether (MTBE) were  
415 added as extraction solvent and the mixture was vortexed for 10 s and mixed on an orbital shaker  
416 for 6 min. Phase separation was induced by adding 187.5  $\mu\text{L}$  of water followed by 20 s of  
417 vortexing. All steps were performed at 4 °C on ice. Finally, the mixture was centrifuged for 4 min  
418 at 14,000 x g at 4 °C and stored at -80 °C. For targeted bile acids analysis, samples were thawed  
419 on ice. 400  $\mu\text{L}$  of ethanol were added to further precipitate protein, as well as 15  $\mu\text{L}$  of isotope-  
420 labeled internal standard mix (12.5  $\mu\text{M}$  d4-T $\alpha$ MCA, 10  $\mu\text{M}$  d4-CDCA). The samples were  
421 vortexed for 20 s and centrifuged for 4 min at 14,000 g at 4 °C after which the supernatant (ca.  
422 1000  $\mu\text{L}$ ) was taken out and dried down. Dried supernatants were resuspended in 60  $\mu\text{L}$  mobile  
423 phase (50 %B), vortexed for 20 s, centrifuged for 4 min at 14,000 g and then 50  $\mu\text{L}$  were transferred  
424 to vials with glass inserts for MS analysis.

425

426 **Sample preparation for cecal bile acid analysis.**  $30 \pm 7.5$  mg cecal contents along with 10  $\mu\text{L}$   
427 SPLASH Lipidomix internal standard mixture were aliquoted into a tube with a metal bead and  
428 270  $\mu\text{L}$  MeOH were added for protein precipitation. To each tube, 900  $\mu\text{L}$  MTBE and 225  $\mu\text{L}$  of  
429 water were added as extraction solvents. All steps were performed at 4 °C on ice. The mixture was  
430 homogenized by bead beating for 8 min at 25 Hz. Finally, the mixture was centrifuged for 4-8 min  
431 at 11,000 x g at 4 °C. Subsequent processing for the DO mice and eight DO founder strains differed  
432 due to other analyses performed on the samples that are not presented in this paper. For DO  
433 samples, 100  $\mu\text{L}$  of the aqueous and 720  $\mu\text{L}$  of organic layer were combined and stored at -80 °C.  
434 For analysis, these were thawed on ice and 400  $\mu\text{L}$  of ethanol were added to further precipitate  
435 protein, as well as 15  $\mu\text{L}$  of isotope-labeled internal standard mix (12.5  $\mu\text{M}$  d4-T $\alpha$ MCA, 10  $\mu\text{M}$

436 d4-CDCA). The samples were vortexed for 20 s and centrifuged for 4 min at 14,000 g at 4 °C after  
437 which the supernatant (ca. 1000 µL) was taken out and dried down. Dried supernatants were  
438 resuspended in 100 µL mobile phase (50 %B), vortexed for 20 s, centrifuged for 8 min at 14,000  
439 g and then 50 µL were transferred to vials with glass inserts for MS analysis. For the eight DO  
440 founder strains, the mixture was dried down including all solid parts and stored dried at -80 °C.  
441 For targeted bile acid analysis, these dried down samples were then thawed on ice and reconstituted  
442 in 270 µL of methanol, 900 µL of MTBE, and 225 µL of water. 400 µL of ethanol were added to  
443 further precipitate protein, as well as 15 µL of isotope-labeled internal standard mix (12.5 µM d4-  
444 TαMCA, 10 µM d4-CDCA). The mixture was bead beat for 8 min at 25 Hz and centrifuged at  
445 14,000 g for 8 minutes after which the supernatant (ca. 1500 µL) was taken out and dried down.  
446 Dried supernatants were resuspended in 100 µL mobile phase (50 %B), vortexed for 20 s,  
447 centrifuged for 4 min at 14,000 g and then 90 µL were transferred to vials with glass inserts for  
448 MS analysis.

449

450 **Measurement and analysis of mouse bile acids.** LC-MS analysis was performed in randomized  
451 order using an Acquity CSH C18 column held at 50 °C (100 mm × 2.1 mm × 1.7 µm particle size;  
452 Waters) connected to an Ultimate 3000 Binary Pump (400 µL/min flow rate; Thermo Scientific).  
453 Mobile phase A consisted of 10 mM ammonium acetate containing 1 mL/L ammonium hydroxide.  
454 Mobile phase B consisted of MeOH with the same additives (111). Mobile phase B was initially  
455 held at 50% for 1.5 min and then increased to 70% over 13.5 min. Mobile phase B was further  
456 increased to 99% over 0.5 min and held for 2.5 min. The column was re-equilibrated for 5.5 min  
457 before the next injection. Twenty microliters of plasma sample or ten microliters of cecum sample  
458 were injected by an Ultimate 3000 autosampler (Thermo Scientific). The LC system was coupled

459 to a TSQ Quantiva Triple Quadrupole mass spectrometer (Thermo Scientific) by a heated ESI  
460 source kept at 325°C (Thermo Scientific). The inlet capillary was kept at 350 °C, sheath gas was  
461 set to 15 units, auxiliary gas to 10 units, and the negative spray voltage was set to 2,500 V. For  
462 targeted analysis the MS was operated in negative single reaction monitoring (SRM) mode  
463 acquiring scheduled, targeted scans to quantify selected bile acid transitions, with two transitions  
464 for each species' precursor and 3 min retention time windows. Collision energies were optimized  
465 for each species and ranging from 20-55 V. Due to insufficient fragmentation for unconjugated  
466 bile acids, the precursor was monitored as one transition with a CE of 20 V. MS acquisition  
467 parameters were 0.7 FWHM resolution for Q1 and Q3, 1 s cycle time, 1.5 mTorr CID gas and 3 s  
468 Chrom filter. In total, 27 bile acids, including 14 unconjugated, 9 tauro- and 4 glycine-conjugated  
469 species, were measured. The resulting bile acid data were processed using Skyline 3.6.0.10493  
470 (University of Washington). For each species, one transition was picked for quantitation, while the  
471 other was used for retention time confirmation. Normalization of the quantitative data was  
472 performed to the internal standard d4-CDCA as indicated in Equation 1.

473 **Equation 1:**  $(\text{Peak Area} / \text{d4-CDCA Peak Area}) \cdot \text{Average of d4-CDCA Peak Area}$

474

475 **Genotyping.** Genotyping was performed on tail biopsies as previously described (42) using the  
476 Mouse Universal Genotyping Array (GigaMUGA) [143,259 markers] (112) at Neogen (Lincoln,  
477 NE). Genotypes were converted to founder strain-haplotype reconstructions using a hidden  
478 Markov model (HMM) implemented in the R/qt12 package (48). We interpolated the GigaMUGA  
479 markers onto an evenly spaced grid with 0.02-cM spacing and added markers to fill in regions with  
480 sparse physical representation, which resulted in 69,005 pseudomarkers.

481

482 **QTL mapping.** We performed QTL mapping using the R package R/qtl2 (48). QTL mapping was  
483 done through a regression of the phenotype on the founder haplotype probabilities estimated with  
484 an HMM designed for multi-parental populations. Genome scans were performed for each  
485 phenotype with sex, cohort (wave), and days on diet included as additive covariates. Genetic  
486 similarity between mice was accounted for using a kinship matrix based on the leave-one-  
487 chromosome-out (LOCO) methods (113). For microbial QTL mapping, normalized gut microbiota  
488 abundance data transformed to normal quantiles. For bile acid QTL mapping, normalized plasma  
489 and cecal bile acid levels were log<sub>2</sub> transformed. The mapping statistic reported is log of the odds  
490 ratio (LOD). The significance thresholds were determined by performing 1000 permutations of  
491 genome-wide scans by shuffling phenotypic data in relation to individual genotypes. Significant  
492 QTL were determined at a genome-wide *P*-value of < 0.05 and the QTL support interval was  
493 defined using the 95% Bayesian confidence interval.

494

495 **Mediation/Pleiotropy analysis.** To assess whether two co-mapping traits were caused by a  
496 pleiotropic locus, we used a likelihood ratio test implemented with the open source R package  
497 R/qtl2pleio (70). Here, we compared the alternative hypothesis of two distinct loci with the null  
498 hypothesis of pleiotropy for two traits that map to the same genetic region. Parametric  
499 bootstrapping was used to determine statistical significance. Mediation analysis was applied to  
500 identify whether a microbe or bile acid were likely to be a causal mediator of the QTL as presented  
501 in Li et al. (114). This analysis was adapted from a general approach previously described to  
502 differentiate target from mediator variables (115). The effect of a mediator on a target was  
503 evaluated by performing an allele scan or SNP scan using the target adjusted by mediator. Only  
504 individuals with both values for both traits were considered for mediation analysis. Traits with a

505 LOD drop >2 after controlling for the mediator were considered for further causality testing. To  
506 statistically assess causality between microbial and bile acid trait sets (causal, reactive,  
507 independent, undecided), a causal model selection test (72) was applied using the R packages  
508 R/intermediate and R/qlt2. Causal model selection tests were evaluated on both alleles and SNPs  
509 in peak region.

510

511 **RNA extraction.** Total RNA was extracted from flash-frozen distal ileum tissues by TRIzol  
512 extraction and further cleaned using the RNeasy Mini Kit (Qiagen, Germantown, MD, USA). DNA  
513 was removed by on-column DNase digestion (Qiagen). Purified RNA was quantified using a  
514 Nanodrop 2000 spectrophotometer.

515

516 **Quantitative Real-Time PCR.** SuperScript II Reverse Transcriptase with oligo(dT) primer (all  
517 from Invitrogen, Carlsbad, CA, USA) was used to synthesize 20  $\mu$ l cDNA templates from 1  $\mu$ g  
518 purified RNA. cDNA was diluted 2X before use and qRT-PCR reactions were prepared in a 10  $\mu$ l  
519 volume using SsoAdvanced Universal SYBR Green Supermix (Bio-Rad, Hercules, CA, USA) and  
520 400 nM specific primers targeting the gene of interest (SLC10A2-F [5'-  
521 TGGGTTTCTTCCTGGCTAGACT-3']; SLC10A2-R [5'- TGTTCTGCATTCCAGTTTCCAA-  
522 3'] (116)). All reactions were performed in triplicate. Reactions were run on a CFX96 Real-Time  
523 PCR System (Bio-Rad, Hercules, CA, USA). The  $2^{-\Delta\Delta C_t}$  method (117) was used to calculate  
524 relative changes in gene expression and all results were normalized to GAPDH.

525

526 **Bacterial culturing.** Bacterial strains were obtained from DSMZ and ATCC. All strains were  
527 cultured at 37°C under anaerobic conditions using an anaerobic chamber (Coy Laboratory

528 Products) with a gas mix of 5% hydrogen, 20% carbon dioxide and 75% nitrogen. Strains were  
529 grown in rich medium (S5 Table) that was filter sterilized and stored in the anaerobic chamber at  
530 least 24 hours prior to use. *L. reuteri* was grown in medium supplemented with 20 mM glucose.  
531 For all *in vitro* assays, cultures used for inoculation were grown overnight at 37°C in 10 mL 14b  
532 medium in anaerobic Hungate tubes. Stock solutions of conjugated bile acids (TCA, GCDCA) and  
533 unconjugated bile acids (CA, CDCA, DCA) were prepared to a final concentration of 100 mM and  
534 used for all *in vitro* assays. All bile acids used were soluble in methanol.

535  
536 **Microbial bile acid metabolism screen.** Stock solutions of conjugated and unconjugated bile  
537 acids (100 mM) were added to 3 ml 14b medium to obtain a final concentration of 100 µM total  
538 bile acid. Tubes were inoculated with a *T. sanguinis* cultured overnight, then incubated in the  
539 anaerobic chamber at 37°C for 48 hours. At the 24- and 48-hour timepoints, 1 mL of each culture  
540 was removed and the supernatant was collected after brief centrifugation. Each culture supernatant  
541 was diluted 10x in initial running solvent (30:70 MeOH:10 mM ammonium acetate). Samples were  
542 spun at max speed for 3 minutes to remove suspended particles prior to loading on the uHPLC.  
543 Samples were analyzed using a uHPLC coupled with a high-resolution mass spectrometer.

544  
545 **Microbial bile acid screen uHPLC-MS/MS parameters.** 10 µL aliquots of diluted supernatant  
546 samples were analyzed using a uHPLC-MS/MS system consisting of a Vanquish uHPLC coupled  
547 by electrospray ionization (ESI) (negative mode) to a hybrid quadrupole-high-resolution mass  
548 spectrometer (Q Exactive Orbitrap; Thermo Scientific). Liquid chromatography separation was  
549 achieved on an Acquity UPLC BEH C<sub>18</sub> column (2.1-by 100-mm column, 1.7-µm particle size)  
550 heated to 50°C. Solvent A was 10 mM Ammonium acetate, pH 6; solvent B was 100% methanol.



551 The total run time was 31.5 minutes with the following gradient: 0 min, 30% B; 0.5 min, 30% B;  
552 24 min, 100% B; 29 min, 100% B; 29 min, 30% B; 31.5 min, 30% B. Bile acid peaks were  
553 identified using the Metabolomics Analysis and Visualization Engine (MAVEN) (118).

554

555 **Growth curves.** Bacterial growth rate was measured in medium 14b supplemented with either 100  
556  $\mu\text{M}$ , 300  $\mu\text{M}$ , 1 mM bile acids or methanol control. Medium was dispensed inside an anaerobic  
557 chamber into Hungate tubes. Tubes containing 10 mL of medium were inoculated with 30  $\mu\text{L}$  of  
558 an overnight culture and incubated at 37°C for 24 hours. *T. sanguinis* was grown with shaking to  
559 disrupt the formation of flocculent colonies. Growth was monitored as the increase in absorbance  
560 at 600 nm in a Spectronic 20D+ spectrophotometer (Thermo Scientific, Waltham, MA, USA).  
561 Growth rate was determined as  $\mu = \ln(X/X_0)/T$ , where  $X$  is the  $\text{OD}_{600}$  value during the linear portion  
562 of growth and  $T$  is time in hours. Values given are the mean  $\mu$  values from two independent cultures  
563 done in triplicate.

564

565 **Statistical analysis.** All statistical analyses were performed in R (v.3.5.1) (119). Unless otherwise  
566 indicated in the figure legends, differences between groups were evaluated using unpaired two-  
567 tailed Welch's t-test. For multiple comparisons, Kruskal-Wallis test was used if ANOVA  
568 conditions were not met, followed by Mann-Whitney/Wilcoxon rank-sum for multiple  
569 comparisons and adjusted for multiple testing using the Benjamini-Hochberg FDR procedure. The  
570 correlation between the abundance of microbial taxa was performed using Spearman's correlation  
571 in the "Hmisc" (v.4.1-1) R package (120). The p-values were adjusted using the Benjamini and  
572 Hochberg method, and correlation coefficients were visualized using the "pheatmap" (v.1.0.10)  
573 (121). Multiple groups were compared by Kruskal-Wallis test and adjusted for multiple testing

574 using the Benjamini-Hochberg FDR procedure. Significance was determined as p-value < 0.05.  
575 To assess magnitude of variability of the CMMs, summary statistics were calculated on each CMM  
576 (taxa and ESVs). Non-parametric-based PERMANOVA statistical test (122) with 999 Monte  
577 Carlo permutations was used to compare microbiota compositions among groups using the Vegan  
578 R package (123).

579

## 580 **Acknowledgements**

581 The authors thank the University of Wisconsin Biotechnology Center DNA Sequencing  
582 Facility for providing sequencing and support services, and the University of Wisconsin Center  
583 for High Throughput Computing (CHTC) in the Department of Computer Sciences for providing  
584 computational resources, support, and assistance. We also thank Paul Dawson for his feedback.

585

## 586 **References**

- 587 1. Clemente JC, Ursell LK, Parfrey LW, Knight R. The impact of the gut microbiota on human  
588 health: an integrative view. *Cell*. 2012 Mar 16;148(6):1258–70.
- 589 2. Le Chatelier E, Nielsen T, Qin J, Prifti E, Hildebrand F, Falony G, et al. Richness of human  
590 gut microbiome correlates with metabolic markers. *Nature*. 2013 Aug 29;500(7464):541–  
591 6.
- 592 3. Sommer F, Bäckhed F. The gut microbiota--masters of host development and physiology.  
593 *Nat Rev Microbiol*. 2013 Apr 1;11(4):227–38.
- 594 4. Lozupone CA, Stombaugh JI, Gordon JI, Jansson JK, Knight R. Diversity, stability and  
595 resilience of the human gut microbiota. *Nature*. 2012 Sep 13;489(7415):220–30.
- 596 5. Zhernakova A, Kurilshikov A, Bonder MJ, Tigchelaar EF, Schirmer M, Vatanen T, et al.

- 597 Population-based metagenomics analysis reveals markers for gut microbiome composition  
598 and diversity. *Science*. 2016 Apr 29;352(6285):565–9.
- 599 6. Rothschild D, Weissbrod O, Barkan E, Kurilshikov A, Korem T, Zeevi D, et al.  
600 Environment dominates over host genetics in shaping human gut microbiota. *Nature*. 2018  
601 Mar 8;555(7695):210–5.
- 602 7. Dill-McFarland K, Tang Z-Z, Kemis J, Kerby R, Chen G, Palloni A, et al. Social  
603 relationships, social isolation, and the human gut microbiota. *bioRxiv*. 2018 Sep 27;428938.
- 604 8. Ussar S, Fujisaka S, Kahn CR. Interactions between host genetics and gut microbiome in  
605 diabetes and metabolic syndrome. *Mol Metab*. 2016 Sep 1;5(9):795–803.
- 606 9. Hall AB, Tolonen AC, Xavier RJ. Human genetic variation and the gut microbiome in  
607 disease. *Nat Rev Genet*. 2017 Nov 1;18(11):690–9.
- 608 10. Karlsson F, Tremaroli V, Nielsen J, Backhed F. Assessing the Human Gut Microbiota in  
609 Metabolic Diseases. *Diabetes*. 2013 Sep 24;62(10):3341–9.
- 610 11. Petersen C, Round JL. Defining dysbiosis and its influence on host immunity and disease.  
611 *Cell Microbiol*. 2014 Jul;16(7):1024–33.
- 612 12. Petra AI, Panagiotidou S, Hatziagelaki E, Stewart JM, Conti P, Theoharides TC. Gut-  
613 Microbiota-Brain Axis and Its Effect on Neuropsychiatric Disorders With Suspected  
614 Immune Dysregulation. *Clin Ther*. 2015 May 1;37(5):984–95.
- 615 13. Goodrich JK, Waters JL, Poole AC, Sutter JL, Koren O, Blekhman R, et al. Human genetics  
616 shape the gut microbiome. *Cell*. 2014 Nov 6;159(4):789–99.
- 617 14. Plovier H, Everard A, Druart C, Depommier C, Van Hul M, Geurts L, et al. A purified  
618 membrane protein from *Akkermansia muciniphila* or the pasteurized bacterium improves  
619 metabolism in obese and diabetic mice. *Nat Med*. 2017 Jan 1;23(1):107–13.

- 620 15. Kasahara K, Krautkramer KA, Org E, Romano KA, Kerby RL, Vivas EI, et al. Interactions  
621 between *Roseburia intestinalis* and diet modulate atherogenesis in a murine model. *Nat*  
622 *Microbiol.* 2018 Nov 5;1.
- 623 16. Kurilshikov A, Wijmenga C, Fu J, Zhernakova A. Host Genetics and Gut Microbiome:  
624 Challenges and Perspectives. *Trends Immunol.* 2017 Sep 1;38(9):633–47.
- 625 17. Parks BW, Nam E, Org E, Kostem E, Norheim F, Hui ST, et al. Genetic control of obesity  
626 and gut microbiota composition in response to high-fat, high-sucrose diet in mice. *Cell*  
627 *Metab.* 2013 Jan 8;17(1):141–52.
- 628 18. Kreznar JH, Keller MP, Traeger LL, Rabaglia ME, Schueler KL, Stapleton DS, et al. Host  
629 Genotype and Gut Microbiome Modulate Insulin Secretion and Diet-Induced Metabolic  
630 Phenotypes. *Cell Rep.* 2017 Feb 14;18(7):1739–50.
- 631 19. Vijay-Kumar M, Aitken JD, Carvalho FA, Cullender TC, Mwangi S, Srinivasan S, et al.  
632 Metabolic syndrome and altered gut microbiota in mice lacking Toll-like receptor 5.  
633 *Science.* 2010 Apr 9;328(5975):228–31.
- 634 20. Henao-Mejia J, Elinav E, Jin C, Hao L, Mehal WZ, Strowig T, et al. Inflammasome-  
635 mediated dysbiosis regulates progression of NAFLD and obesity. *Nature.* 2012 Feb  
636 1;482(7384):179–85.
- 637 21. Rehman A, Sina C, Gavrilova O, Hasler R, Ott S, Baines JF, et al. *Nod2* is essential for  
638 temporal development of intestinal microbial communities. *Gut.* 2011 Oct 1;60(10):1354–  
639 62.
- 640 22. Lamas B, Richard ML, Leducq V, Pham H-P, Michel M-L, Da Costa G, et al. *CARD9*  
641 impacts colitis by altering gut microbiota metabolism of tryptophan into aryl hydrocarbon  
642 receptor ligands. *Nat Med.* 2016 Jun 9;22(6):598–605.

- 643 23. Leamy LJ, Kelly SA, Nietfeldt J, Legge RM, Ma F, Hua K, et al. Host genetics and diet,  
644 but not immunoglobulin A expression, converge to shape compositional features of the gut  
645 microbiome in an advanced intercross population of mice. *Genome Biol.* 2014 Jan  
646 1;15(12):552.
- 647 24. Benson AK, Kelly SA, Legge R, Ma F, Low SJ, Kim J, et al. Individuality in gut microbiota  
648 composition is a complex polygenic trait shaped by multiple environmental and host genetic  
649 factors. *Proc Natl Acad Sci U S A.* 2010 Nov 2;107(44):18933–8.
- 650 25. McKnite AM, Perez-Munoz ME, Lu L, Williams EG, Brewer S, Andreux PA, et al. Murine  
651 gut microbiota is defined by host genetics and modulates variation of metabolic traits. White  
652 BA, editor. *PLoS One.* 2012 Jan 1;7(6):e39191.
- 653 26. Belheouane M, Gupta Y, Künzel S, Ibrahim S, Baines JF. Improved detection of gene-  
654 microbe interactions in the mouse skin microbiota using high-resolution QTL mapping of  
655 16S rRNA transcripts. *Microbiome.* 2017 Jun 6;5(1):59.
- 656 27. Goodrich JK, Davenport ER, Beaumont M, Jackson MA, Knight R, Ober C, et al. Genetic  
657 Determinants of the Gut Microbiome in UK Twins. *Cell Host Microbe.* 2016 May  
658 11;19(5):731–43.
- 659 28. Blekhman R, Goodrich JK, Huang K, Sun Q, Bukowski R, Bell JT, et al. Host genetic  
660 variation impacts microbiome composition across human body sites. *Genome Biol.* 2015  
661 Sep 15;16(1):191.
- 662 29. Bonder MJ, Kurilshikov A, Tigchelaar EF, Mujagic Z, Imhann F, Vila AV, et al. The effect  
663 of host genetics on the gut microbiome. *Nat Genet.* 2016 Nov 1;48(11):1407–12.
- 664 30. Wang Z, Klipfell E, Bennett BJ, Koeth R, Levison BS, Dugar B, et al. Gut flora metabolism  
665 of phosphatidylcholine promotes cardiovascular disease. *Nature.* 2011 Apr

- 666 7;472(7341):57–63.
- 667 31. Herrema H, IJzerman RG, Nieuwdorp M. Emerging role of intestinal microbiota and  
668 microbial metabolites in metabolic control. *Diabetologia*. 2017 Apr 1;60(4):613–7.
- 669 32. Krautkramer KA, Kreznar JH, Romano KA, Vivas EI, Barrett-Wilt GA, Rabaglia ME, et  
670 al. Diet-Microbiota Interactions Mediate Global Epigenetic Programming in Multiple Host  
671 Tissues. *Mol Cell*. 2016 Dec 1;64(5):982–92.
- 672 33. Ridlon JM, Harris SC, Bhowmik S, Kang D-J, Hylemon PB. Consequences of bile salt  
673 biotransformations by intestinal bacteria. *Gut Microbes*. 2016 Jan 1;7(1):22–39.
- 674 34. Romano KA, Martinez-Del Campo A, Kasahara K, Chittim CL, Vivas EI, Amador-Nogues  
675 D, et al. Metabolic, Epigenetic, and Transgenerational Effects of Gut Bacterial Choline  
676 Consumption. *Cell Host Microbe*. 2017 Sep 13;22(3):279–290.e7.
- 677 35. Ridlon JM, Kang D-J, Hylemon PB. Bile salt biotransformations by human intestinal  
678 bacteria. *J Lipid Res*. 2006 Feb 1;47(2):241–59.
- 679 36. Wahlström A, Sayin SI, Marschall H-U, Bäckhed F. Intestinal Crosstalk between Bile Acids  
680 and Microbiota and Its Impact on Host Metabolism. *Cell Metab*. 2016 Jun 15;24(1):41–50.
- 681 37. Kuipers F, Bloks VW, Groen AK. Beyond intestinal soap--bile acids in metabolic control.  
682 *Nat Rev Endocrinol*. 2014 Aug 1;10(8):488–98.
- 683 38. Islam KBMS, Fukiya S, Hagio M, Fujii N, Ishizuka S, Ooka T, et al. Bile acid is a host  
684 factor that regulates the composition of the cecal microbiota in rats. *Gastroenterology*. 2011  
685 Nov 1;141(5):1773–81.
- 686 39. Zheng X, Huang F, Zhao A, Lei S, Zhang Y, Xie G, et al. Bile acid is a significant host  
687 factor shaping the gut microbiome of diet-induced obese mice. *BMC Biol*. 2017 Dec  
688 14;15(1):120.

- 689 40. Begley M, Gahan CGM, Hill C. The interaction between bacteria and bile. *FEMS Microbiol*  
690 *Rev.* 2005 Sep 1;29(4):625–51.
- 691 41. Sayin SI, Wahlström A, Felin J, Jäntti S, Marschall H-U, Bamberg K, et al. Gut microbiota  
692 regulates bile acid metabolism by reducing the levels of tauro-beta-muricholic acid, a  
693 naturally occurring FXR antagonist. *Cell Metab.* 2013 Feb 5;17(2):225–35.
- 694 42. Svenson KL, Gatti DM, Valdar W, Welsh CE, Cheng R, Chesler EJ, et al. High-resolution  
695 genetic mapping using the Mouse Diversity outbred population. *Genetics.* 2012 Feb  
696 1;190(2):437–47.
- 697 43. Churchill GA, Gatti DM, Munger SC, Svenson KL. The Diversity Outbred mouse  
698 population. *Mamm Genome.* 2012 Oct 1;23(9–10):713–8.
- 699 44. Kovacs A, Ben-Jacob N, Tayem H, Halperin E, Iraqi FA, Gophna U. Genotype is a stronger  
700 determinant than sex of the mouse gut microbiota. *Microb Ecol.* 2011 Feb 1;61(2):423–8.
- 701 45. O'Connor A, Quizon PM, Albright JE, Lin FT, Bennett BJ. Responsiveness of  
702 cardiometabolic-related microbiota to diet is influenced by host genetics. *Mamm Genome.*  
703 2014 Dec 1;25(11–12):583–99.
- 704 46. Keller MP, Gatti DM, Schueler KL, Rabaglia ME, Stapleton DS, Simecek P, et al. Genetic  
705 Drivers of Pancreatic Islet Function. *Genetics.* 2018 May 1;209(1):335–56.
- 706 47. Callahan BJ, McMurdie PJ, Rosen MJ, Han AW, Johnson AJA, Holmes SP. DADA2: High-  
707 resolution sample inference from Illumina amplicon data. *Nat Methods.* 2016 Jul  
708 1;13(7):581–3.
- 709 48. Broman KW, Gatti DM, Simecek P, Furlotte NA, Prins P, Sen Ś, et al. R/qtl2: Software for  
710 Mapping Quantitative Trait Loci with High-Dimensional Data and Multi-parent  
711 Populations. *Genetics.* 2018 Dec 27;genetics.301595.2018.

- 712 49. Org E, Parks BW, Joo JWJ, Emert B, Schwartzman W, Kang EY, et al. Genetic and  
713 environmental control of host-gut microbiota interactions. *Genome Res.* 2015 Oct  
714 1;25(10):1558–69.
- 715 50. Davenport ER, Cusanovich DA, Michelini K, Barreiro LB, Ober C, Gilad Y. Genome-Wide  
716 Association Studies of the Human Gut Microbiota. White BA, editor. *PLoS One.* 2015 Jan  
717 1;10(11):e0140301.
- 718 51. de Aguiar Vallim TQ, Tarling EJ, Edwards PA. Pleiotropic roles of bile acids in  
719 metabolism. *Cell Metab.* 2013 May 7;17(5):657–69.
- 720 52. Russell DW. The enzymes, regulation, and genetics of bile acid synthesis. *Annu Rev*  
721 *Biochem.* 2003 Jan 1;72(1):137–74.
- 722 53. Martinot E, Sèdes L, Baptissart M, Lobaccaro J-M, Caira F, Beaudoin C, et al. Bile acids  
723 and their receptors. *Mol Aspects Med.* 2017 Aug 1;56:2–9.
- 724 54. Inoue K, Zhuang L, Maddox DM, Smith SB, Ganapathy V. Structure, function, and  
725 expression pattern of a novel sodium-coupled citrate transporter (NaCT) cloned from  
726 mammalian brain. *J Biol Chem.* 2002 Oct 18;277(42):39469–76.
- 727 55. Pesta DH, Perry RJ, Guebre-Egziabher F, Zhang D, Jurczak M, Fischer-Rosinsky A, et al.  
728 Prevention of diet-induced hepatic steatosis and hepatic insulin resistance by second  
729 generation antisense oligonucleotides targeted to the longevity gene mIndy (Slc13a5).  
730 *Aging (Albany NY).* 2015 Dec 1;7(12):1086–93.
- 731 56. Birkenfeld AL, Lee H-Y, Guebre-Egziabher F, Alves TC, Jurczak MJ, Jornayvaz FR, et al.  
732 Deletion of the mammalian INDY homolog mimics aspects of dietary restriction and  
733 protects against adiposity and insulin resistance in mice. *Cell Metab.* 2011 Aug  
734 3;14(2):184–95.



- 735 57. von Loeffelholz C, Lieske S, Neuschäfer-Rube F, Willmes DM, Raschzok N, Sauer IM, et  
736 al. The human longevity gene homolog INDY and interleukin-6 interact in hepatic lipid  
737 metabolism. *Hepatology*. 2017 Aug 1;66(2):616–30.
- 738 58. Li L, Li H, Garzel B, Yang H, Sueyoshi T, Li Q, et al. SLC13A5 is a novel transcriptional  
739 target of the pregnane X receptor and sensitizes drug-induced steatosis in human liver. *Mol*  
740 *Pharmacol*. 2015 Apr 1;87(4):674–82.
- 741 59. Staudinger JL, Goodwin B, Jones SA, Hawkins-Brown D, MacKenzie KI, LaTour A, et al.  
742 The nuclear receptor PXR is a lithocholic acid sensor that protects against liver toxicity.  
743 *Proc Natl Acad Sci U S A*. 2001 Mar 13;98(6):3369–74.
- 744 60. Civelek M, Lusis AJ. Systems genetics approaches to understand complex traits. *Nat Rev*  
745 *Genet*. 2014 Jan 1;15(1):34–48.
- 746 61. Sehayek E, Hagey LR, Fung Y-Y, Duncan EM, Yu HJ, Eggertsen G, et al. Two loci on  
747 chromosome 9 control bile acid composition: evidence that a strong candidate gene,  
748 *Cyp8b1*, is not the culprit. *J Lipid Res*. 2006 Sep 1;47(9):2020–7.
- 749 62. Theriot CM, Bowman AA, Young VB. Antibiotic-Induced Alterations of the Gut  
750 Microbiota Alter Secondary Bile Acid Production and Allow for *Clostridium difficile* Spore  
751 Germination and Outgrowth in the Large Intestine. Ellermeier CD, editor. *mSphere*. 2016  
752 Jan 1;1(1):e00045-15.
- 753 63. Dawson PA, Haywood J, Craddock AL, Wilson M, Tietjen M, Kluckman K, et al. Targeted  
754 deletion of the ileal bile acid transporter eliminates enterohepatic cycling of bile acids in  
755 mice. *J Biol Chem*. 2003 Sep 5;278(36):33920–7.
- 756 64. Oelkers P, Kirby LC, Heubi JE, Dawson PA. Primary bile acid malabsorption caused by  
757 mutations in the ileal sodium-dependent bile acid transporter gene (*SLC10A2*). *J Clin*

- 758 Invest. 1997 Apr 15;99(8):1880–7.
- 759 65. Maurano MT, Humbert R, Rynes E, Thurman RE, Haugen E, Wang H, et al. Systematic  
760 localization of common disease-associated variation in regulatory DNA. *Science*. 2012 Sep  
761 7;337(6099):1190–5.
- 762 66. Chen J, Tian W. Explaining the disease phenotype of intergenic SNP through predicted long  
763 range regulation. *Nucleic Acids Res*. 2016 Oct 14;44(18):8641–54.
- 764 67. Janssen AWF, Dijk W, Boekhorst J, Kuipers F, Groen AK, Lukovac S, et al. ANGPTL4  
765 promotes bile acid absorption during taurocholic acid supplementation via a mechanism  
766 dependent on the gut microbiota. *Biochim Biophys Acta*. 2017 Oct 1;1862(10 Pt A):1056–  
767 67.
- 768 68. Out C, Patankar J V, Doktorova M, Boesjes M, Bos T, de Boer S, et al. Gut microbiota  
769 inhibit Asbt-dependent intestinal bile acid reabsorption via Gata4. *J Hepatol*. 2015 Sep  
770 1;63(3):697–704.
- 771 69. Miyata M, Yamakawa H, Hamatsu M, Kuribayashi H, Takamatsu Y, Yamazoe Y.  
772 Enterobacteria modulate intestinal bile acid transport and homeostasis through apical  
773 sodium-dependent bile acid transporter (SLC10A2) expression. *J Pharmacol Exp Ther*.  
774 2011 Jan 1;336(1):188–96.
- 775 70. Boehm F. qtl2pleio: Hypothesis test of close linkage vs pleiotropy in multiparental  
776 populations. 2018.
- 777 71. MacKinnon DP, Fairchild AJ, Fritz MS. Mediation analysis. *Annu Rev Psychol*. 2007 Jan  
778 1;58(1):593–614.
- 779 72. Neto EC, Broman AT, Keller MP, Attie AD, Zhang B, Zhu J, et al. Modeling causality for  
780 pairs of phenotypes in system genetics. *Genetics*. 2013 Mar 1;193(3):1003–13.

- 781 73. Onishi JC, Campbell S, Moreau M, Patel F, Brooks AI, Zhou YX, et al. Bacterial  
782 communities in the small intestine respond differently to those in the caecum and colon in  
783 mice fed low- and high-fat diets. *Microbiology*. 2017 Aug 1;163(8):1189–97.
- 784 74. Li D, Chen H, Mao B, Yang Q, Zhao J, Gu Z, et al. Microbial Biogeography and Core  
785 Microbiota of the Rat Digestive Tract. *Sci Rep*. 2017 Apr 4;8(1):45840.
- 786 75. Northfield TC, McColl I. Postprandial concentrations of free and conjugated bile acids  
787 down the length of the normal human small intestine. *Gut*. 1973 Jul 1;14(7):513–8.
- 788 76. Hamilton JP, Xie G, Raufman J-P, Hogan S, Griffin TL, Packard CA, et al. Human cecal  
789 bile acids: concentration and spectrum. *Am J Physiol Gastrointest Liver Physiol*. 2007 Jul  
790 1;293(1):G256-63.
- 791 77. Falony G, Joossens M, Vieira-Silva S, Wang J, Darzi Y, Faust K, et al. Population-level  
792 analysis of gut microbiome variation. *Science*. 2016 Apr 29;352(6285):560–4.
- 793 78. Wang J, Thingholm LB, Skiecevičienė J, Rausch P, Kummén M, Hov JR, et al. Genome-  
794 wide association analysis identifies variation in vitamin D receptor and other host factors  
795 influencing the gut microbiota. *Nat Genet*. 2016 Nov 1;48(11):1396–406.
- 796 79. Edenharter R, Pfützner A, Hammann R. Characterization of NAD-dependent 3 alpha- and  
797 3 beta-hydroxysteroid dehydrogenase and of NADP-dependent 7 beta-hydroxysteroid  
798 dehydrogenase from *Peptostreptococcus productus*. *Biochim Biophys Acta*. 1989 Aug  
799 8;1004(2):230–8.
- 800 80. Chen C, Sargent C, Quilter C, Yang Z, Ren J, Affara N, et al. Cloning, mapping and  
801 molecular characterization of porcine progesterone receptor membrane component 2  
802 (PGRMC2) gene. *Genet Mol Biol*. 2010 Jul 1;33(3):471–4.
- 803 81. Gerdes D, Wehling M, Leube B, Falkenstein E. Cloning and tissue expression of two

- 804 putative steroid membrane receptors. *Biol Chem.* 1998 Jul 1;379(7):907–11.
- 805 82. Wendler A, Wehling M. PGRMC2, a yet uncharacterized protein with potential as tumor  
806 suppressor, migration inhibitor, and regulator of cytochrome P450 enzyme activity.  
807 *Steroids.* 2013 Jun 1;78(6):555–8.
- 808 83. Hughes AL, Powell DW, Bard M, Eckstein J, Barbuch R, Link AJ, et al. Dap1/PGRMC1  
809 binds and regulates cytochrome P450 enzymes. *Cell Metab.* 2007 Feb 1;5(2):143–9.
- 810 84. Pierre JF, Martinez KB, Ye H, Nadimpalli A, Morton TC, Yang J, et al. Activation of bile  
811 acid signaling improves metabolic phenotypes in high-fat diet-induced obese mice. *Am J*  
812 *Physiol Gastrointest Liver Physiol.* 2016 Aug 1;311(2):G286-304.
- 813 85. Van den Bossche L, Hindryckx P, Devisscher L, Devriese S, Van Welden S, Holvoet T, et  
814 al. Ursodeoxycholic Acid and Its Taurine- or Glycine-Conjugated Species Reduce  
815 Colitogenic Dysbiosis and Equally Suppress Experimental Colitis in Mice. Elkins CA,  
816 editor. *Appl Environ Microbiol.* 2017 Apr 1;83(7):e02766-16.
- 817 86. van der Ark KCH, Nugroho ADW, Berton-Carabin C, Wang C, Belzer C, de Vos WM, et  
818 al. Encapsulation of the therapeutic microbe *Akkermansia muciniphila* in a double emulsion  
819 enhances survival in simulated gastric conditions. *Food Res Int.* 2017 Dec 1;102:372–9.
- 820 87. Derrien M, Vaughan EE, Plugge CM, de Vos WM. *Akkermansia muciniphila* gen. nov., sp.  
821 nov., a human intestinal mucin-degrading bacterium. *Int J Syst Evol Microbiol.* 2004 Sep  
822 1;54(Pt 5):1469–76.
- 823 88. Belzer C, de Vos WM. Microbes inside--from diversity to function: the case of  
824 *Akkermansia*. *ISME J.* 2012 Aug 1;6(8):1449–58.
- 825 89. Shekels LL, Lyftogt CT, Ho SB. Bile acid-induced alterations of mucin production in  
826 differentiated human colon cancer cell lines. *Int J Biochem Cell Biol.* 1996 Feb

- 827 1;28(2):193–201.
- 828 90. Klinkspoor JH, Mok KS, Van Klinken BJW, Tytgat GNJ, Lee SP, Groen AK. Mucin  
829 secretion by the human colon cell line LS174T is regulated by bile salts. *Glycobiology*.  
830 1999 Jan 1;9(1):13–9.
- 831 91. Everard A, Belzer C, Geurts L, Ouwerkerk JP, Druart C, Bindels LB, et al. Cross-talk  
832 between *Akkermansia muciniphila* and intestinal epithelium controls diet-induced obesity.  
833 *Proc Natl Acad Sci U S A*. 2013 May 28;110(22):9066–71.
- 834 92. Cani PD, de Vos WM. Next-Generation Beneficial Microbes: The Case of *Akkermansia*  
835 *muciniphila*. *Front Microbiol*. 2017 Jan 1;8:1765.
- 836 93. Derrien M, Van Baarlen P, Hooiveld G, Norin E, Müller M, de Vos WM. Modulation of  
837 Mucosal Immune Response, Tolerance, and Proliferation in Mice Colonized by the Mucin-  
838 Degrader *Akkermansia muciniphila*. *Front Microbiol*. 2011 Jan 1;2:166.
- 839 94. Arakawa R, Bagashev A, Song L, Maurer K, Sullivan KE. Characterization of LRRFIP1.  
840 *Biochem Cell Biol*. 2010 Dec 1;88(6):899–906.
- 841 95. Shi L, Song L, Fitzgerald M, Maurer K, Bagashev A, Sullivan KE. Noncoding RNAs and  
842 LRRFIP1 regulate TNF expression. *J Immunol*. 2014 Apr 1;192(7):3057–67.
- 843 96. Maravillas-Montero JL, Burkhardt AM, Hevezi PA, Carnevale CD, Smit MJ, Zlotnik A.  
844 Cutting edge: GPR35/CXCR8 is the receptor of the mucosal chemokine CXCL17. *J*  
845 *Immunol*. 2015 Jan 1;194(1):29–33.
- 846 97. Su Z, Cox A, Shen Y, Stylianou IM, Paigen B. *Farp2* and *Stk25* are candidate genes for the  
847 HDL cholesterol locus on mouse chromosome 1. *Arterioscler Thromb Vasc Biol*. 2009 Jan  
848 1;29(1):107–13.
- 849 98. Purcell-Huynh DA, Weinreb A, Castellani LW, Mehrabian M, Doolittle MH, Lusic AJ.

- 850 Genetic factors in lipoprotein metabolism. Analysis of a genetic cross between inbred  
851 mouse strains NZB/BINJ and SM/J using a complete linkage map approach. *J Clin Invest.*  
852 1995 Oct 1;96(4):1845–58.
- 853 99. Ishimori N, Li R, Kelmenson PM, Korstanje R, Walsh KA, Churchill GA, et al. Quantitative  
854 trait loci analysis for plasma HDL-cholesterol concentrations and atherosclerosis  
855 susceptibility between inbred mouse strains C57BL/6J and 129S1/SvImJ. *Arterioscler*  
856 *Thromb Vasc Biol.* 2004 Jan 1;24(1):161–6.
- 857 100. Su Z, Ishimori N, Chen Y, Leiter EH, Churchill GA, Paigen B, et al. Four additional mouse  
858 crosses improve the lipid QTL landscape and identify *Lipg* as a QTL gene. *J Lipid Res.*  
859 2009 Oct 1;50(10):2083–94.
- 860 101. Fu J, Bonder MJ, Cenit MCMC, Tigchelaar EF, Maatman A, Dekens JAMM, et al. The  
861 Gut Microbiome Contributes to a Substantial Proportion of the Variation in Blood Lipids.  
862 *Circ Res.* 2015 Oct 9;117(9):817–24.
- 863 102. Kozich JJ, Westcott SL, Baxter NT, Highlander SK, Schloss PD. Development of a dual-  
864 index sequencing strategy and curation pipeline for analyzing amplicon sequence data on  
865 the MiSeq Illumina sequencing platform. *Appl Environ Microbiol.* 2013 Sep  
866 1;79(17):5112–20.
- 867 103. Caporaso JG, Kuczynski J, Stombaugh J, Bittinger K, Bushman FD, Costello EK, et al.  
868 QIIME allows analysis of high-throughput community sequencing data. *Nat Methods.* 2010  
869 May 1;7(5):335–6.
- 870 104. Katoh K, Standley DM. MAFFT multiple sequence alignment software version 7:  
871 improvements in performance and usability. *Mol Biol Evol.* 2013 Apr 1;30(4):772–80.
- 872 105. Price MN, Dehal PS, Arkin AP. FastTree 2--approximately maximum-likelihood trees for

- 873 large alignments. Poon AFY, editor. PLoS One. 2010 Mar 10;5(3):e9490.
- 874 106. Bokulich NA, Kaehler BD, Rideout JR, Dillon M, Bolyen E, Knight R, et al. Optimizing  
875 taxonomic classification of marker-gene amplicon sequences with QIIME 2's q2-feature-  
876 classifier plugin. Microbiome. 2018 May 17;6(1):90.
- 877 107. McDonald D, Price MN, Goodrich J, Nawrocki EP, DeSantis TZ, Probst A, et al. An  
878 improved Greengenes taxonomy with explicit ranks for ecological and evolutionary  
879 analyses of bacteria and archaea. ISME J. 2012 Mar 1;6(3):610–8.
- 880 108. Lozupone C, Knight R. UniFrac: a new phylogenetic method for comparing microbial  
881 communities. Appl Environ Microbiol. 2005 Dec 1;71(12):8228–35.
- 882 109. McMurdie PJ, Holmes S. phyloseq: an R package for reproducible interactive analysis and  
883 graphics of microbiome census data. Watson M, editor. PLoS One. 2013 Jan 1;8(4):e61217.
- 884 110. Paulson JN, Stine OC, Bravo HC, Pop M. Differential abundance analysis for microbial  
885 marker-gene surveys. Nat Methods. 2013 Dec 1;10(12):1200–2.
- 886 111. Scherer M, Gnewuch C, Schmitz G, Liebisch G. Rapid quantification of bile acids and their  
887 conjugates in serum by liquid chromatography-tandem mass spectrometry. J Chromatogr  
888 B. 2009;877:3920–5.
- 889 112. Morgan AP, Fu C-P, Kao C-Y, Welsh CE, Didion JP, Yadgary L, et al. The Mouse  
890 Universal Genotyping Array: From Substrains to Subspecies. G3 (Bethesda). 2015 Dec  
891 18;6(2):263–79.
- 892 113. Yang J, Zaitlen NA, Goddard ME, Visscher PM, Price AL. Advantages and pitfalls in the  
893 application of mixed-model association methods. Nat Genet. 2014 Feb;46(2):100–6.
- 894 114. Li Y, Tesson BM, Churchill GA, Jansen RC. Critical reasoning on causal inference in  
895 genome-wide linkage and association studies. Trends Genet. 2010 Dec 1;26(12):493–8.

- 896 115. Baron RM, Kenny DA. The moderator-mediator variable distinction in social  
897 psychological research: conceptual, strategic, and statistical considerations. *J Pers Soc*  
898 *Psychol.* 1986 Dec 1;51(6):1173–82.
- 899 116. Rao A, Kusters A, Mells JE, Zhang W, Setchell KDR, Amanso AM, et al. Inhibition of  
900 ileal bile acid uptake protects against nonalcoholic fatty liver disease in high-fat diet-fed  
901 mice. *Sci Transl Med.* 2016 Sep 21;8(357):357ra122-357ra122.
- 902 117. Livak KJ, Schmittgen TD. Analysis of relative gene expression data using real-time  
903 quantitative PCR and the 2(-Delta Delta C(T)) Method. *Methods.* 2001 Dec 1;25(4):402–8.
- 904 118. Clasquin MF, Melamud E, Rabinowitz JD. LC-MS data processing with MAVEN: a  
905 metabolomic analysis and visualization engine. *Curr Protoc Bioinforma.* 2012 Mar  
906 1;Chapter 14(1):Unit14.11-14.11.23.
- 907 119. R Core Team. R: A Language and environment for statistical computing. R Foundation for  
908 Statistical Computing;
- 909 120. Harrell Jr FE, others with contributions from CD and many. *Hmisc: Harrell Miscellaneous.*  
910 2018.
- 911 121. Kolde R. *pheatmap: Pretty Heatmaps.* 2018.
- 912 122. McArdle BH, Anderson MJ. Fitting Multivariate Models to Community Data: A Comment  
913 on Distance-Based Redundancy Analysis. *Ecology.* 2001 Jan 1;82(1):290–7.
- 914 123. Oksanen J, Blanchet FG, Friendly M, Kindt R, Legendre P, McGlinn D, et al. *vegan:*  
915 *Community Ecology Package.* 2018.

916

917 **Figure legends**



918 **Figure 1.** Phenotypic variation among Diversity Outbred (DO) mice fed high-fat and high-sucrose  
919 diet. (A) Body weight at 6, 10, 14, and 21-25 (sacrifice) weeks in DO mice fed high-fat and high-  
920 sucrose diet (n = 500) (Adapted from Keller et al. (46)) (B) Distributions of the normalized relative  
921 abundance of bacterial phyla identified in DO fecal microbiota (n = 399). (C) Abundance (peak  
922 area) of primary bile acids detected in plasma and (D) cecal contents (n = 384).

923

924 **Figure 2.** Genetic architecture of quantitative trait loci (QTL) for microbial exact sequence  
925 variants (ESVs) and taxa abundance, and plasma and cecal bile acids in 400 Diversity Outbred  
926 (DO) mice. The outer layer shows the chromosome location where major tick marks correspond  
927 to 25 Mbp. Logarithm of the odds (LOD) range is shown for each track. Each dot represents a  
928 QTL on each chromosome of the mouse genome for a given trait. Grey dots denote QTLs with  
929 LOD < 5.5. Candidate genes discussed in text are denoted.

930

931 **Figure 3.** Co-mapping of *Turicibacter sp.* and plasma cholic acid (CA) QTL on chromosome 8.  
932 Association of (A) fecal abundance of *Turicibacter sp.* and (B) plasma CA levels on chromosome  
933 (chr) 8. The x-axis indicates the position in Mbp along chr 8. The y-axis for the top panel and the  
934 y-axis in the bottom panel is the LOD score. A/J and WSB founder alleles are associated with  
935 higher and lower levels of *Turicibacter* and plasma CA levels, respectively. The estimated founder  
936 strain abundance of (C) *Turicibacter* and (D) levels of plasma CA in the DO population reflects  
937 measured values observed in founder strains for (E) the abundance of *Turicibacter sp.* and (F)  
938 plasma cholic acid levels (n = 8 mice/genotype, 4 male and 4 female). (E) Spearman rank  
939 correlation between *Turicibacter sp.* and plasma CA in DO mice (n=192). (F) Spearman rank  
940 correlation between *Turicibacter* genera and plasma cholic acid in DO founder strains (n = 19).

941 (G) SNPs (top panel) and protein coding genes (bottom panel) under the QTL interval. Magenta  
942 dots correspond to SNPs with the strongest association where the LOD drop  $< 1.5$  from the top  
943 SNP. (H) Relative expression of *Slc10a2* measured in the distal ileum by qRT-PCR in A/J and  
944 WSB parental strains ( $n = 6$ , 3 male and 3 female). Data are presented as mean  $\pm$  SEM; Welch's  $t$   
945 test; \*  $p < 0.05$ . Correlation  $p$ -values adjusted for multiple tests using Benjamini and Hochberg  
946 correction. ND – not detected.

947

948 **Figure 4.** Mediation analysis and causal inference testing suggest causal relationship between  
949 *Turicibacter sp.* abundance and plasma cholic acid (CA) levels. (A) Hypothetical causal model  
950 that proposes that cholic acid (CA) mediates the changes in *Turicibacter sp.* abundance. (B)  
951 Change in LOD score of plasma CA when adjusting for *Turicibacter sp.* abundance. The x-axis  
952 indicates the position in Mbp along chr 8. (C) Hypothetical causal model that proposes that  
953 *Turicibacter sp.* mediates changes in abundance of plasma CA levels. (D) Change in LOD score  
954 of *Turicibacter sp.* when controlling for plasma CA levels.

955

956 **Figure 5.** *Turicibacter sanguinis* and bile acid interactions. (A) Percent of conjugated bile acids  
957 detected after 24-hour incubation with or without the presence of *T. sanguinis*. (B)  
958 Transformation of cholic acid (CA) to 7-dehydrocholic acid (7-dHCA), and (C)  
959 chenodeoxycholic acid (CDCA) to 7-ketolithocholic acid (7-KLCA) by *T. sanguinis* after 24  
960 hours. Growth of *T. sanguinis* in the presence of 0.1 mM, 0.5 mM, 1 mM and 5 mM (D)  
961 conjugated (equimolar pool of taurocholic acid (TCA) and glycochenodeoxycholic acid  
962 (GCDCA)), and (E) unconjugated (equimolar pool of cholic CA, CDCA, and deoxycholic acid  
963 (DCA)) bile acids over 24 hours. (F) Growth rate ( $\mu$ ) of *T. sanguinis* in medium supplemented

964 with varying concentrations of conjugated and unconjugated bile acids. Data shown are from one  
965 experiment with three technical replicates. Data are presented as mean  $\pm$  SEM; one-way  
966 ANOVA followed by Tukey's multiple comparisons test; \*\*  $p < 0.01$ , \*\*\*  $p < 0.001$ , \*\*\*\*  $p <$   
967  $0.0001$ .

968

## 969 **Supporting information legends**

970 **S1 Figure. Principal coordinate analysis (PCoA) of unweighted UniFrac distances for fecal**  
971 **samples.** PCoA shows significant clustering by (A) sex ( $F = 5.572$ ,  $p = 0.001$ ) and (B) wave ( $F =$   
972  $16.954$ ,  $p = 0.001$ ). Clustering by treatment evaluated by PERMANOVA.

973

974 **S2 Figure. Plasma and cecal bile acids group by sex, but not wave.** PCAs of plasma bile acid  
975 profiles colored by (A) sex ( $p < 0.0001$ ) and (B) wave ( $p = 0.594$ ), and PCAs of cecal bile acid  
976 profiles colored by (C) sex ( $p = 0.011$ ) and (D) wave ( $p = 0.207$ ). Kruskal Wallis one-way test  
977 followed by Wilcoxon pair-wise multiple comparisons with Benjamini and Hochberg correction.

978

979 **S3 Figure. Related bile acid species map associate to same locus.** (A) Haplotype effects and  
980 LOD scores of plasma taurodeoxycholic acid (TDCA), (B) cecal deoxycholic acid (DCA), (C)  
981 cecal isodeoxycholic acid (IDCA) and (D) cecal hyodeoxycholic acid (HDCA). For each plot, the  
982 x-axis is the physical position in Mbp along chr 12. The y-axis for the top panel is the effect  
983 coefficient depicting the estimated contributions of each founder allele, and the y-axis in the  
984 bottom panel is the LOD score. (E) Cecal levels of isolithocholic acid (ILCA) and lithocholic acid  
985 (LCA) associate to same locus on chr 11. (F) Estimated founder allele effects for cecal ILCA and

986 (G) LCA. (H) Genes under cecal LCA and ILCA QTL interval. Dashed lines denote QTL  
987 confidence interval.

988

989 **S4 Figure. Gut associated bacteria have differential growth responses to conjugated bile**

990 **acids.** Growth rate in the presence of 1 mM conjugated bile acids or methanol control for (A)

991 *Bacteroides thetaiotaomicron*, (B) *Clostridium asparagiforme*, (C) *Escherichia coli* MS200-1, and

992 (D) *Lactobacillus reuteri*. Data shown are from duplicate experiments with three technical

993 replicates. Data are presented as mean  $\pm$  SEM; Welch's *t* test; no significant differences were

994 observed between growth conditions for any of the tested organisms.

995

996 **S5 Figure. Peptostreptococcaceae and plasma bile acids co-map on chromosome (chr) 3.**

997 Haplotype effects and LOD scores of (A) Peptostreptococcaceae family, (B) plasma cholic acid

998 (CA), (C) plasma chenodeoxycholic acid (CDCA), (D) plasma muricholic acid (MCA), (E) plasma

999 ursodeoxycholic acid (UDCA), and (F) plasma 7-dehydrocholic acid (7-dHCA). For each plot, the

1000 x-axis is the physical position in Mbp along chr 3. The y-axis for the top panel is the effect

1001 coefficient depicting the estimated contributions of each founder allele, and the y-axis in the

1002 bottom panel is the LOD score. All overlapping QTL have positive association with the NOD

1003 allele. (G) Protein coding genes under QTL interval.

1004

1005 **S6 Figure. Exact sequence variant of *Akkermansia muciniphila* and plasma bile acid QTL**

1006 **overlap on chromosome (chr) 1.** Haplotype effects and LOD scores of (A) *A. muciniphila* (B)

1007 plasma cholic acid (CA), (C) plasma muricholic acid (MCA), and (D) plasma 7-dehydrocholic

1008 acid (7-dHCA). For each plot, the x-axis is the physical position in Mbp along chr 1. The y-axis

1009 for the top panel is the effect coefficient depicting the estimated contributions of each founder  
1010 allele, and the y-axis in the bottom panel is the LOD score. (E) Protein coding genes under 10 Mbp  
1011 QTL interval. Spearman correlations in the DO mice between *A. muiniphila* and (F) plasma CA,  
1012 (G) plasma MCA, and (H) plasma 7-dHCA levels. Correlation p-values adjusted for multiple tests  
1013 using Benjamini and Hochberg correction. Higher levels of these microbial and bile acid traits  
1014 were associated with the NZO haplotype and lower levels were associated with the 129 haplotype.  
1015 (E) Protein coding genes under 10 Mbp QTL interval. Dashed lines denote QTL confidence  
1016 interval. Spearman correlations in the DO mice between *A. muiniphila* and (F) plasma CA, (G)  
1017 plasma MCA, and (H) plasma 7-dHCA levels. Correlation p-values adjusted for multiple tests  
1018 using Benjamini and Hochberg correction.

1019

1020 **S1 Table. Measures of variability of microbial exact sequence variants (ESVs) or taxon**  
1021 **(phylum, class, order, family, genus) in DO mice.** Data presented as normalized read counts; n  
1022 = 399; SD, standard deviation.

1023

1024 **S2 Table. Measures of variability of cecal and plasma bile acids in DO mice.** Bile acid levels  
1025 are presented as  $\log_2(\text{peak area})$ ; n = 384; SD, standard deviation.

1026

1027 **S3 Table. Correlations among microbial taxa, bile acid and weight traits.** Spearman's rank  
1028 correlation. Only microbial exact sequence variants, genera and family included in figure.  
1029 Correlations shown passed FDR < 0.01 cut-off and correlation coefficient either < -0.35 or > 0.35.  
1030 Correlating bile acids from same tissue removed from table for brevity.

1031

1032 **S4 Table. QTL peaks for gut microbiota, plasma and cecal bile acid, and weight traits in the**

1033 **Diversity Outbred mice.** Only QTL with LOD > 5.5 shown. "Pos" is peak position in Mbp. "ci\_lo"

1034 and "ci\_hi" correspond to the positions for the 95% bayesian confidence interval.

1035

1036 **S5 Table. Media used for bacterial culture. Medium 14(b) recipe.**

1037

Figure 1

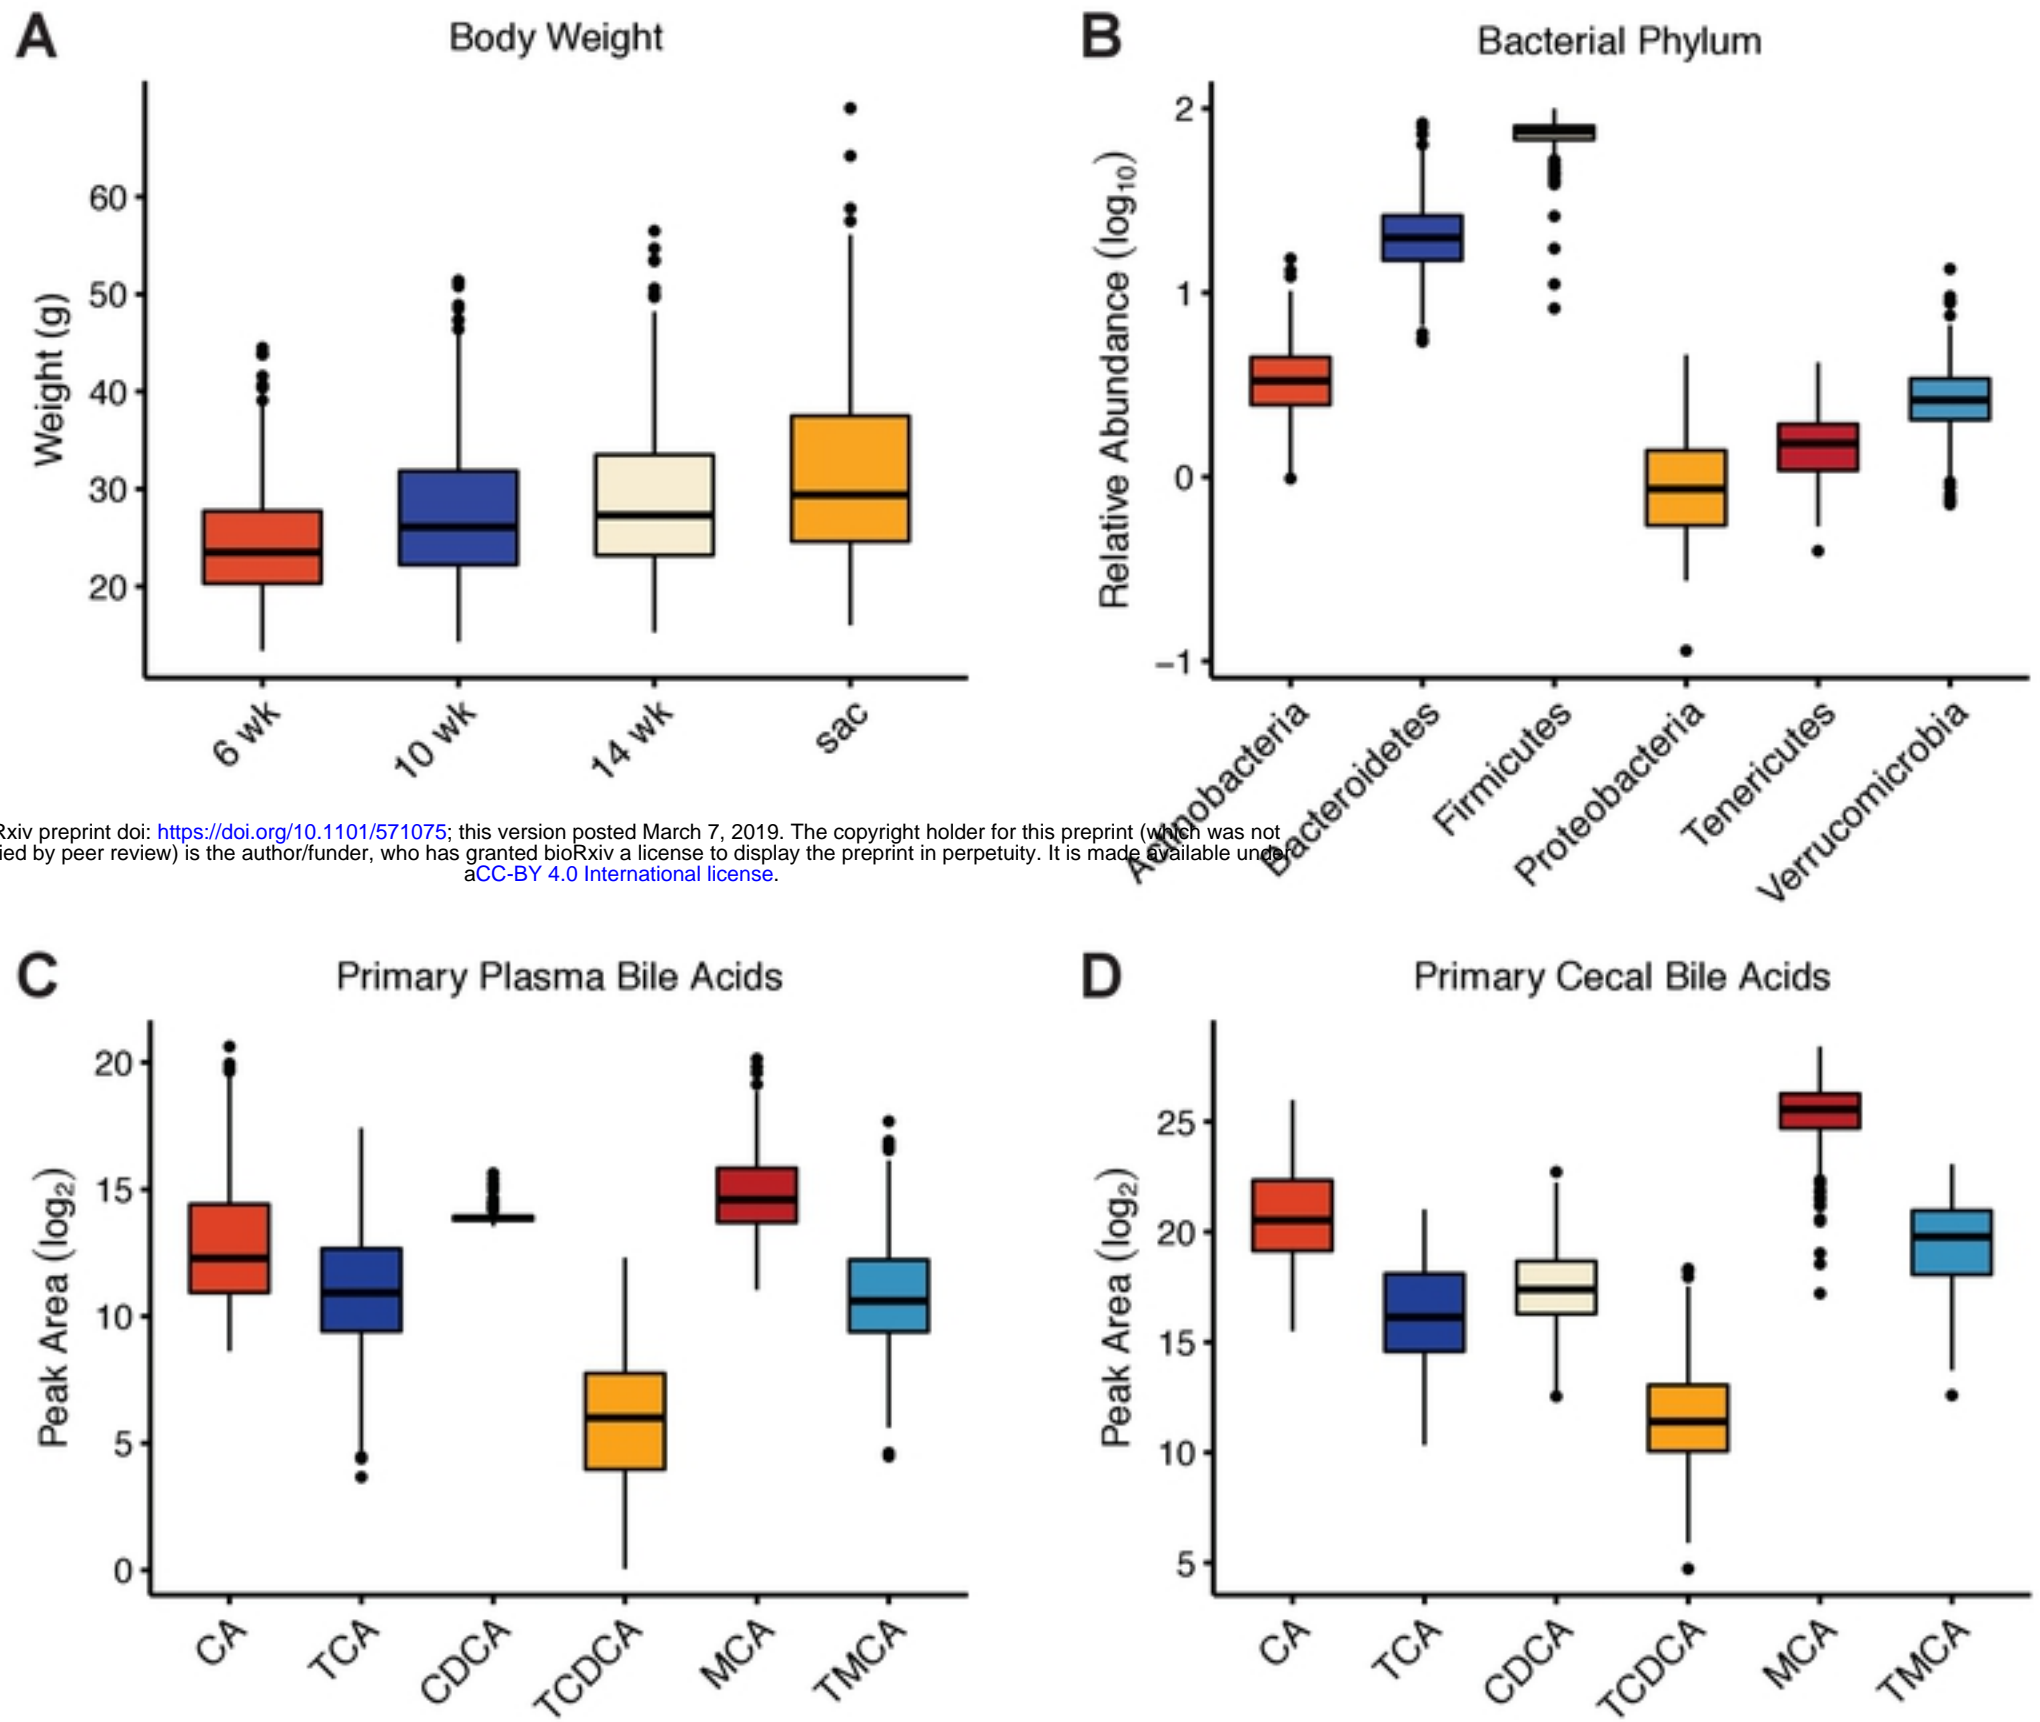

bioRxiv preprint doi: <https://doi.org/10.1101/571075>; this version posted March 7, 2019. The copyright holder for this preprint (which was not certified by peer review) is the author/funder, who has granted bioRxiv a license to display the preprint in perpetuity. It is made available under aCC-BY 4.0 International license.

Figure 2

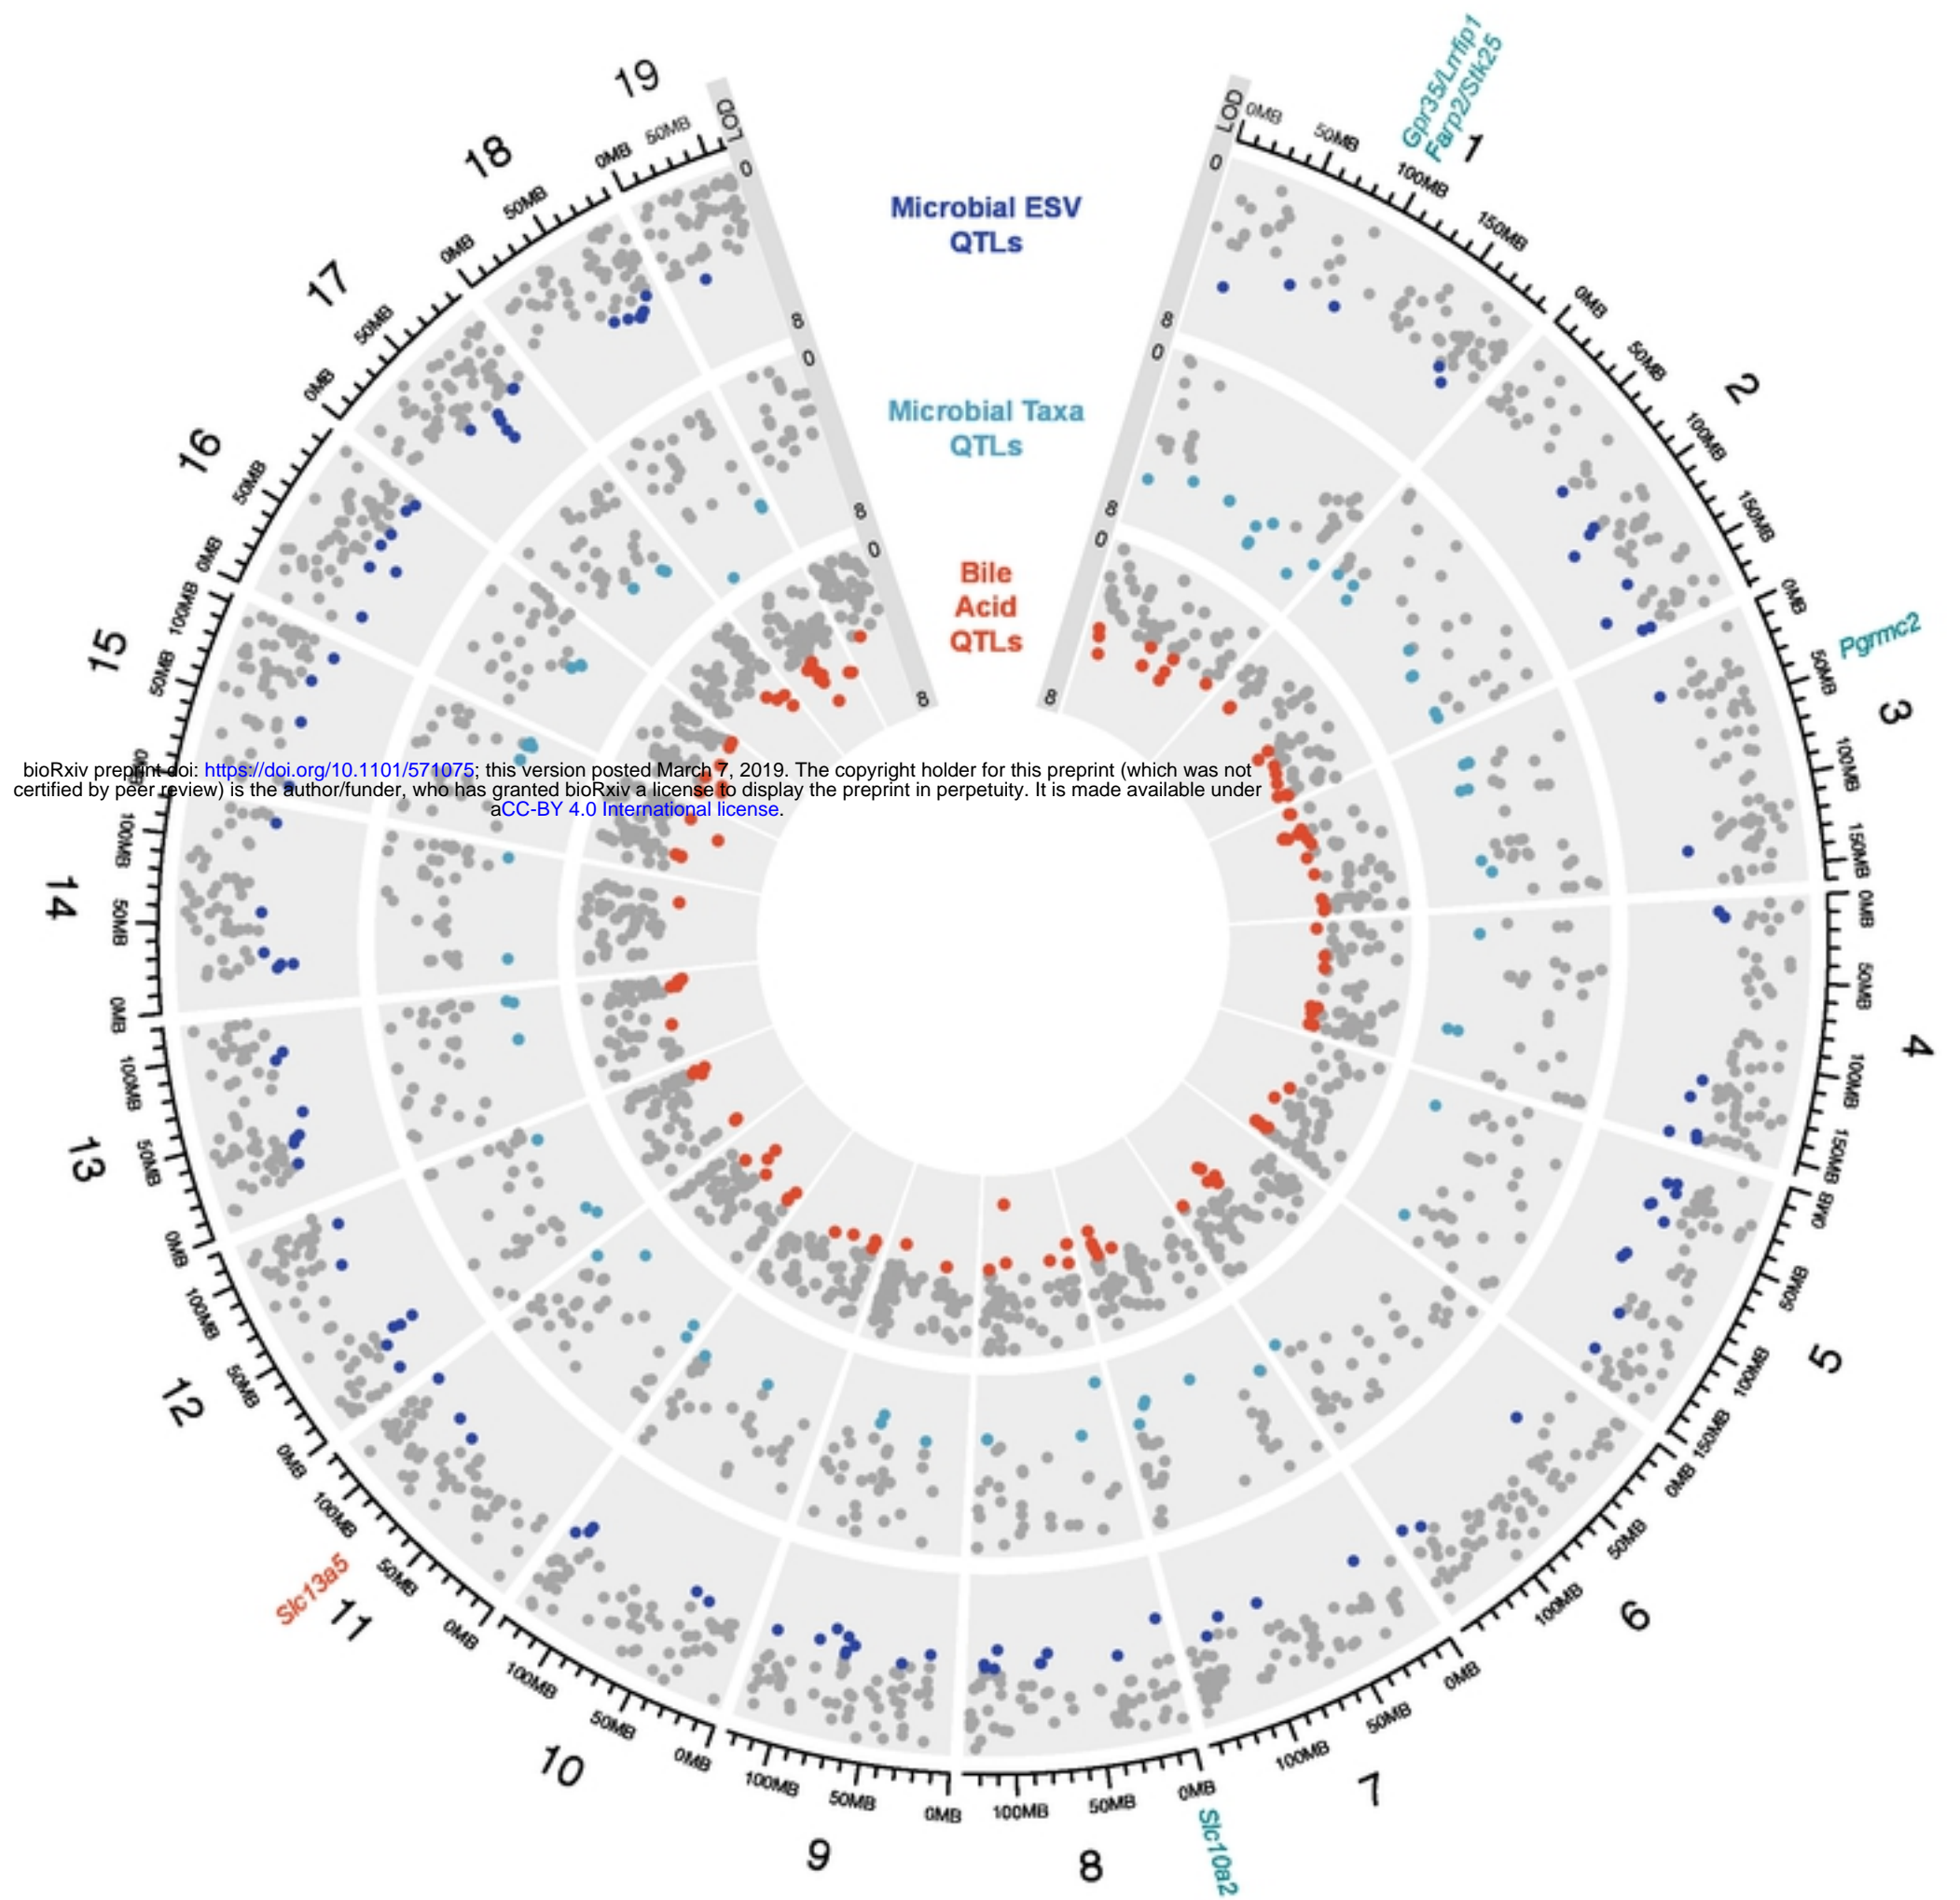



Figure 3

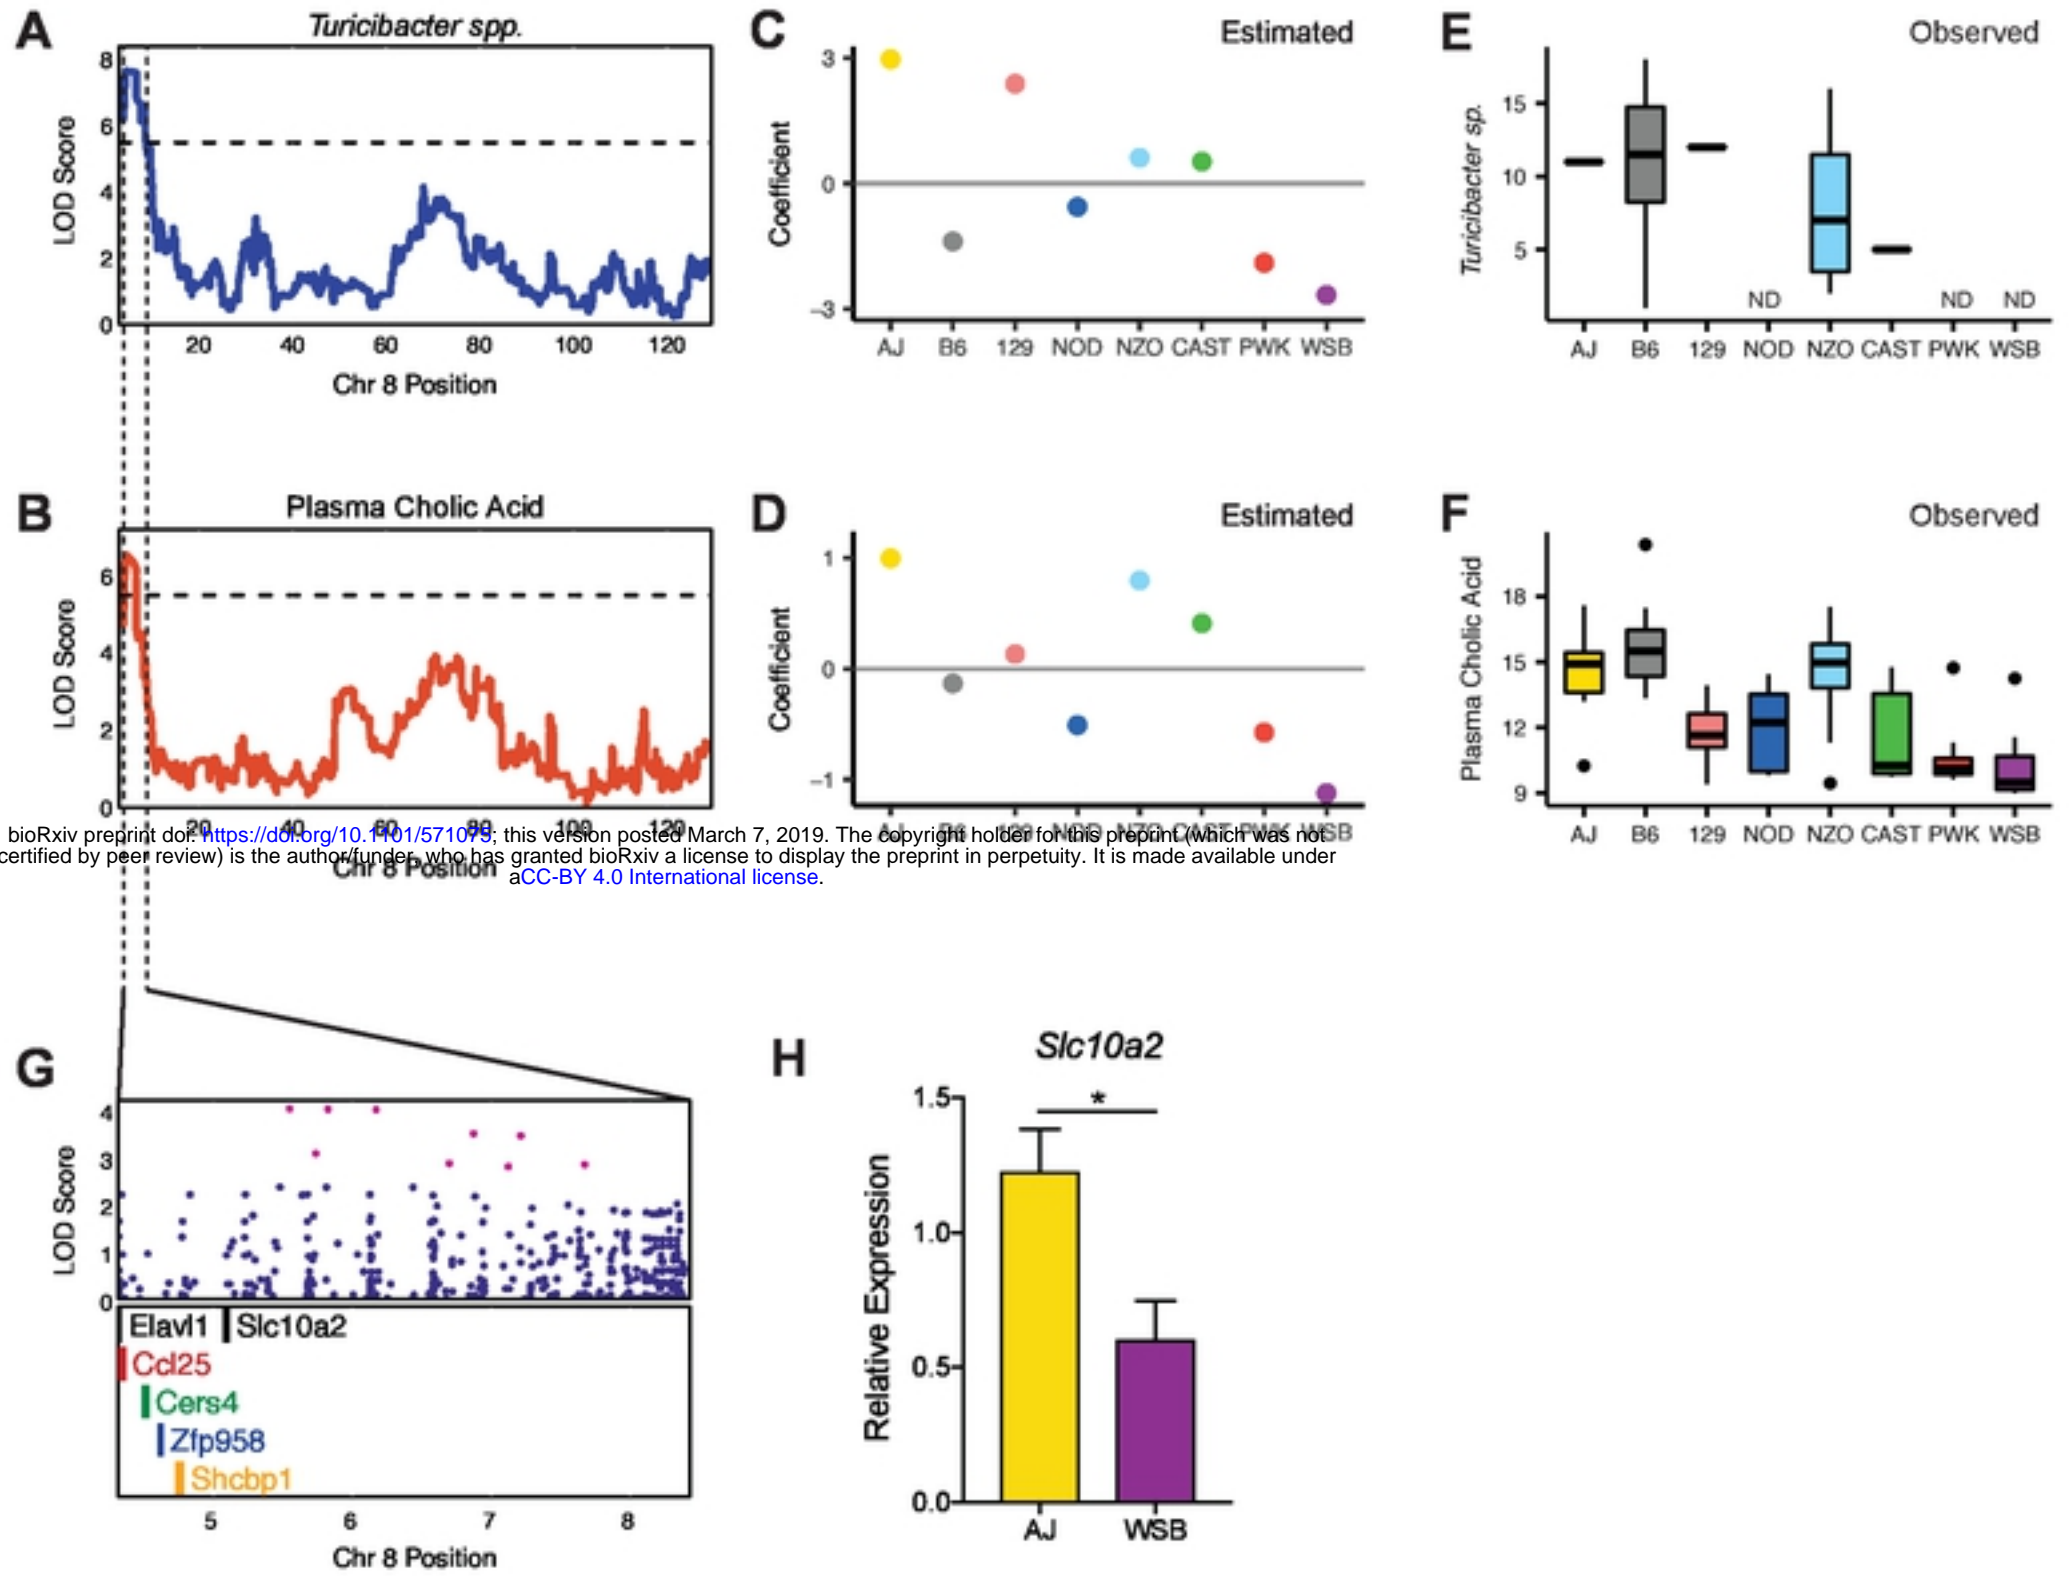

Figure 4

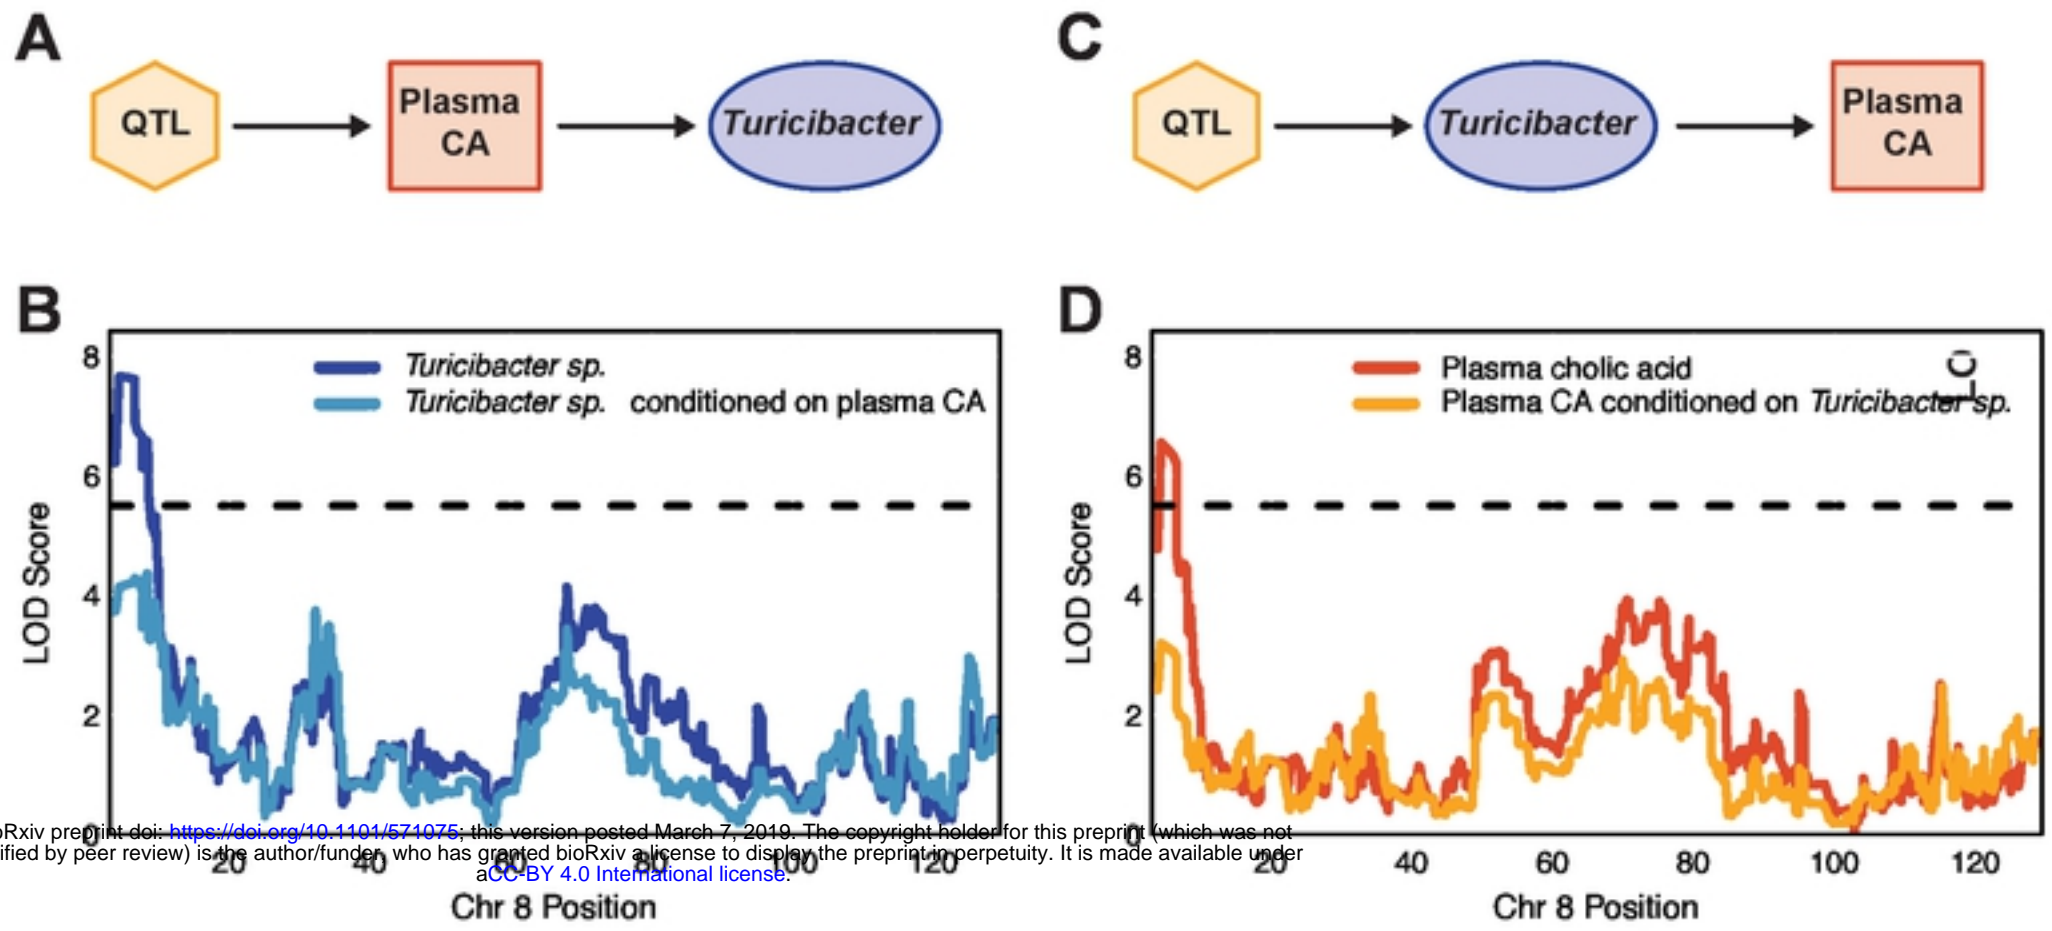

Figure 5

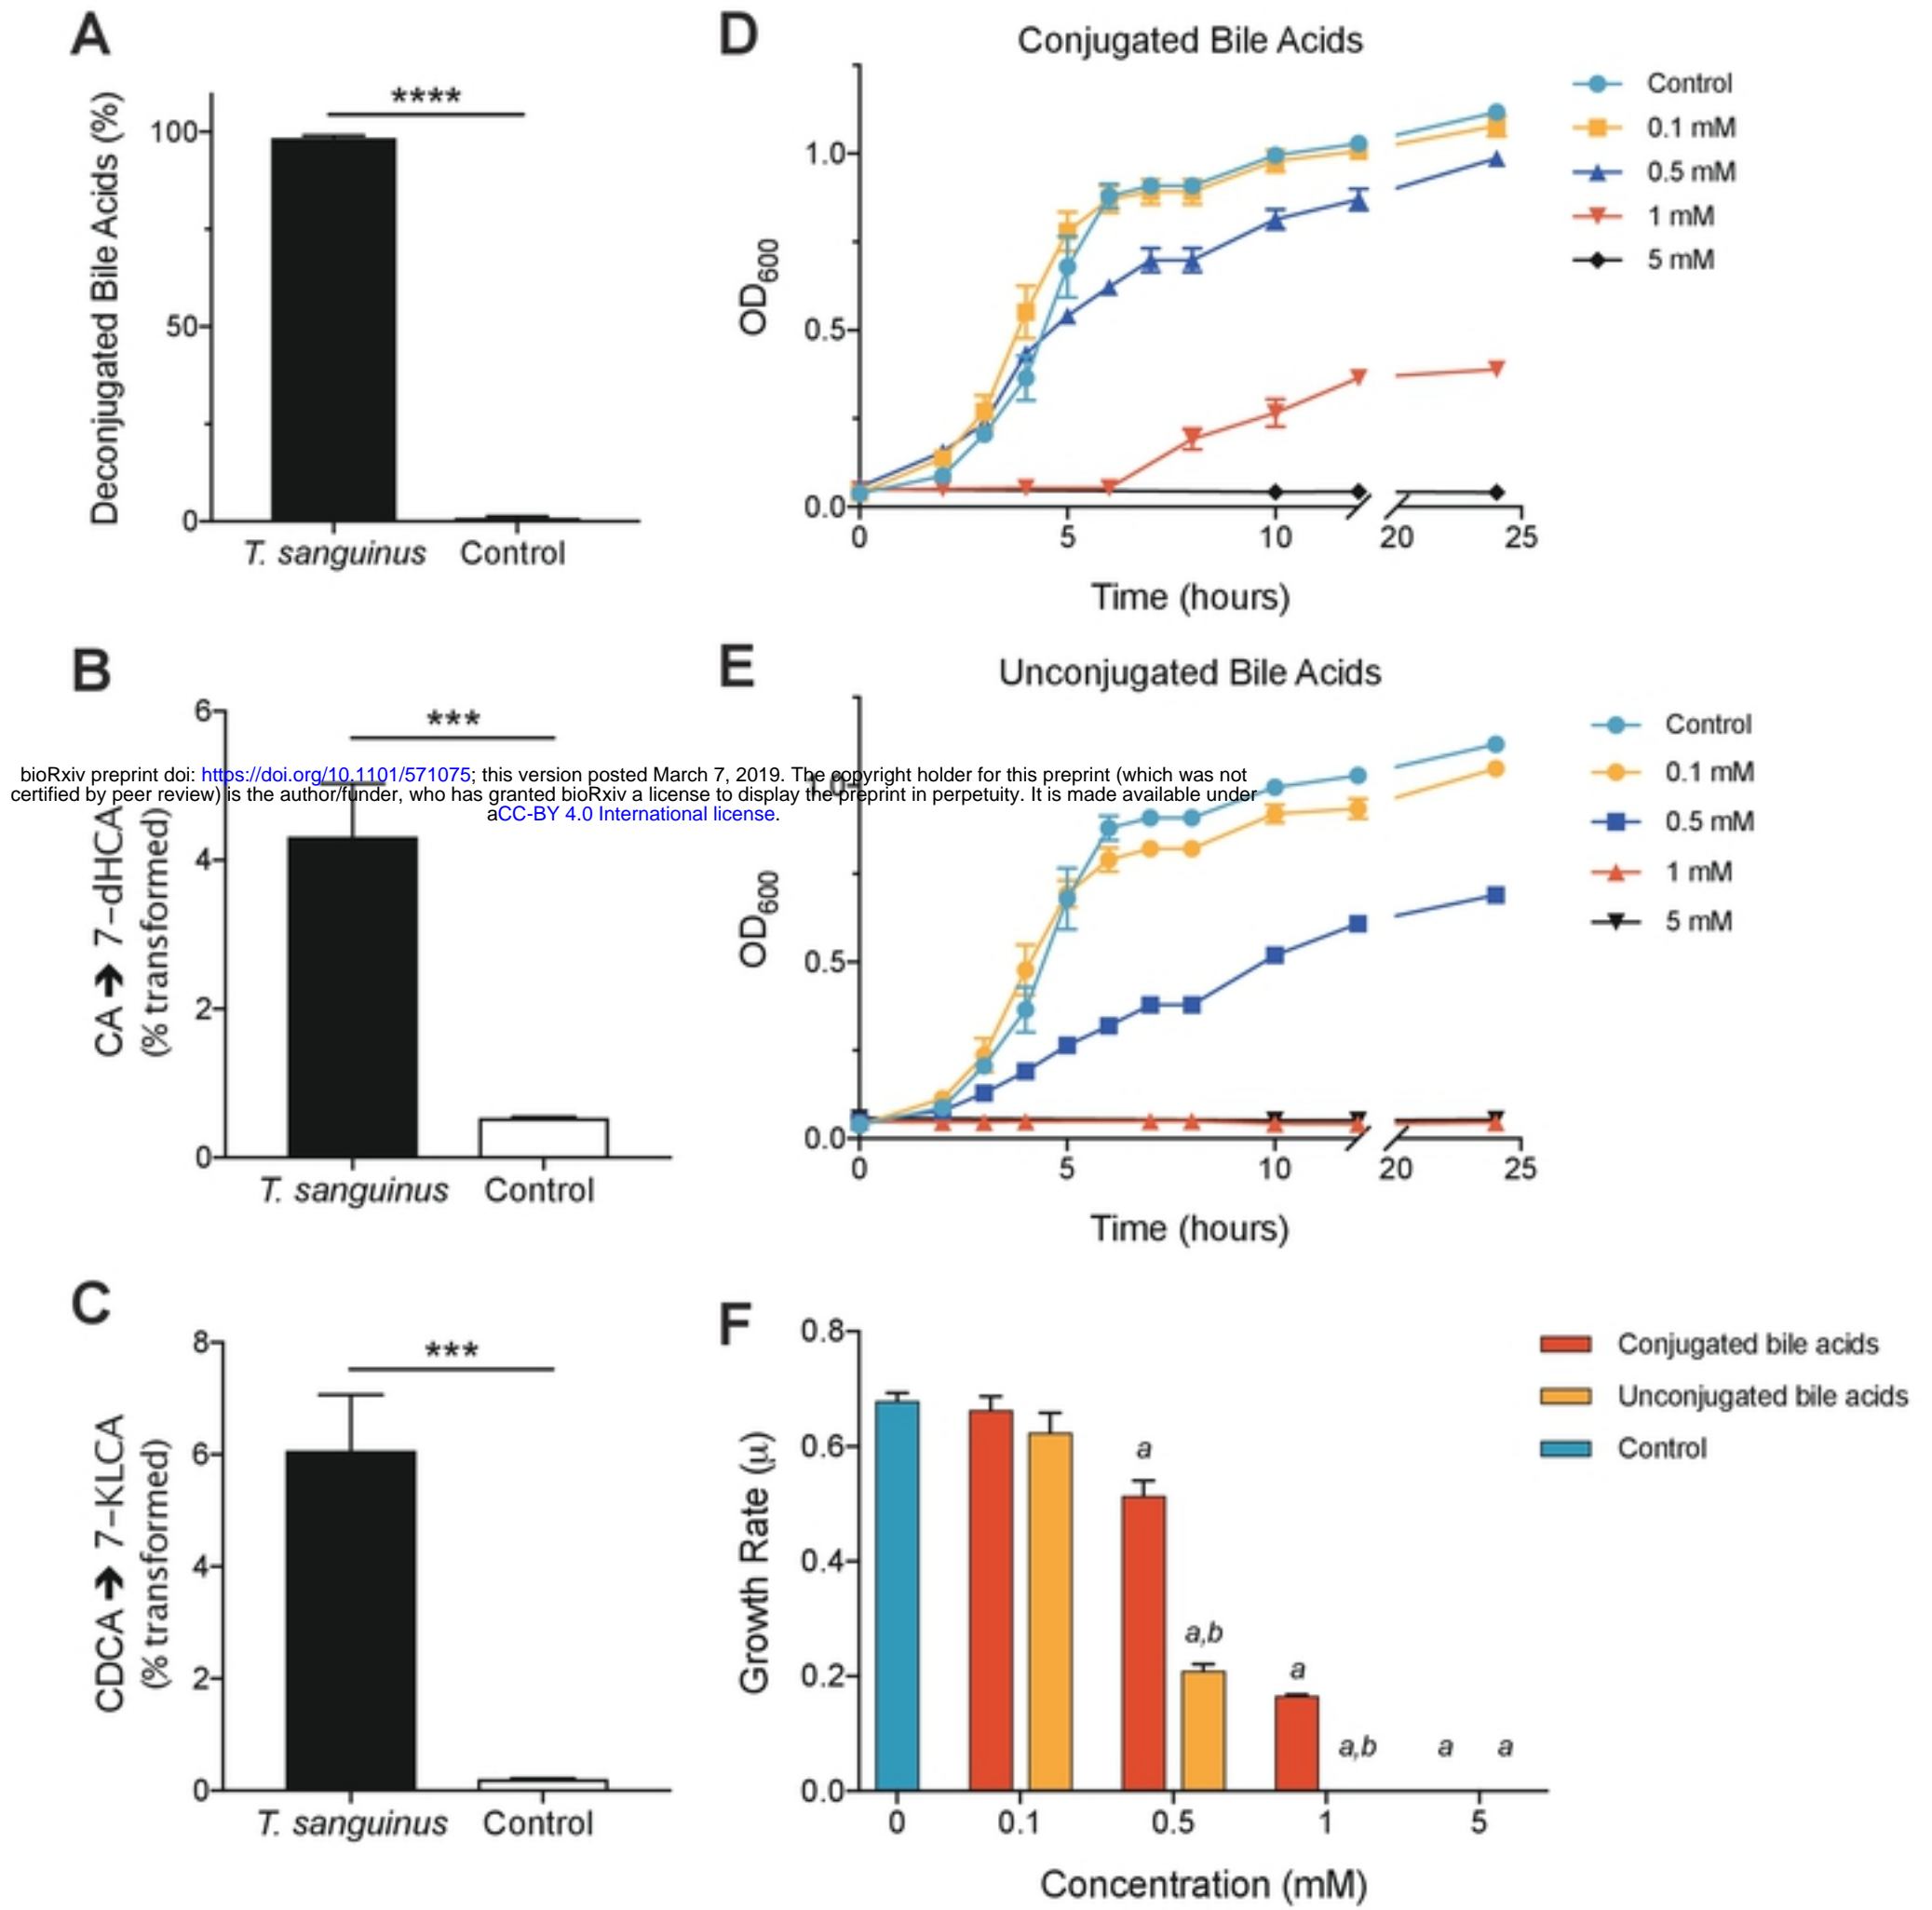

Source: https://www.biorxiv.org/content/10.1101/571075v1.full.pdf
